# Supplementary material for: Odorant-Binding Proteins and Chemosensory Proteins in Spodoptera frugiperda: From Genome-Wide Identification and Developmental Stage-Related Expression Analysis to the Perception of Host Plant Odors, Sex Pheromones, and Insecticides
Source: MDPI journal article supplement (doi:10.3390/ijms24065595), 2023-03-15
Supplement: s1 [file s1]

## Supplemental material

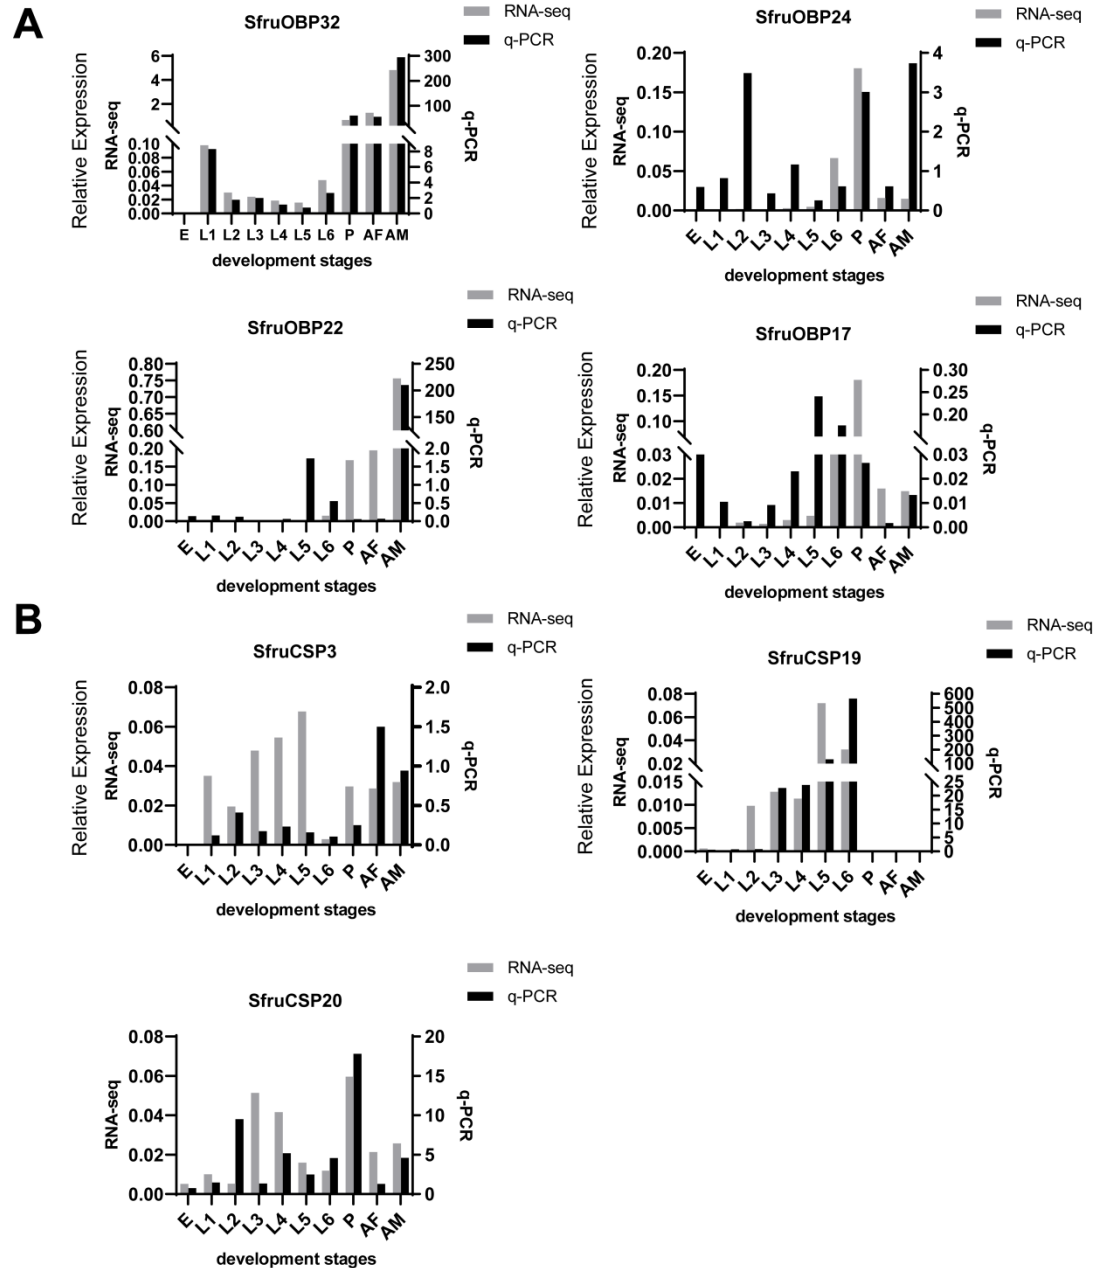

**Figure S1. Measurements of relative expression levels of selected *SfruOBPs* and *SfruCSPs* by RNA-seq and q-RT-PCR.** Expression level of each gene was calculated relative to reference genes of Rp132. (A) expression levels of OBPs. (B) expression levels of CSPs. Expression levels were measured across different developmental stages from eggs to adults (E: eggs; L: larvae; P: pupae; A: adult, where F: females and M: males).

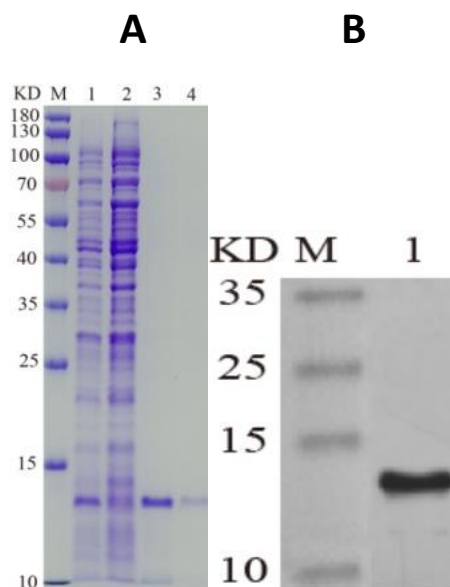

**Figure S2. SfruOBP31 protein expression and purification.** (A) SDS-PAGE analysis of SfruOBP31 protein. M: Protein marker. 1. Induced protein products. 2. Flow through. 3-4. Purified SfruOBP31 protein. (B) Western blot analysis of SfruOBP31 protein. M. Protein marker. 1. Purified SfruOBP31 protein.

**Supplemental Table S1. Results of all *SfruOBPs* and *SfruCSPs* blastx in NCBI**

| Name        | Description              | Insect species               | Max Score | Total Score | Query Cover | E Value | Per. Ident | Acc. Len | Accession      | No. of conserved Cys residues |
|-------------|--------------------------|------------------------------|-----------|-------------|-------------|---------|------------|----------|----------------|-------------------------------|
| <b>OBPs</b> |                          |                              |           |             |             |         |            |          |                |                               |
| OBP1        | OBP 1                    | <i>Sesamia inferens</i>      | 202       | 202         | 80%         | 9E-65   | 88.68%     | 106      | AGS36743.1     | 6                             |
| OBP2        | OBP 2                    | <i>Spodoptera exigua</i>     | 318       | 318         | 99%         | 3E-109  | 94.44%     | 162      | AGH70098.1     | 6                             |
| OBP3        | OBP 3                    | <i>Spodoptera exigua</i>     | 273       | 273         | 93%         | 5E-91   | 85.80%     | 170      | AGH70099.1     | 6                             |
| OBP4        | OBP 4                    | <i>Spodoptera exigua</i>     | 283       | 283         | 99%         | 2E-95   | 81.71%     | 164      | AGH70100.1     | 6                             |
| OBP5        | OBP 5                    | <i>Spodoptera litura</i>     | 224       | 224         | 95%         | 1E-72   | 85.50%     | 147      | AKI87966.1     | 6                             |
| OBP6        | OBP 6                    | <i>Spodoptera exigua</i>     | 230       | 620         | 92%         | 2E-69   | 92.00%     | 147      | AGH70102.1     | 6                             |
| OBP7        | OBP 7                    | <i>Spodoptera exigua</i>     | 195       | 473         | 99%         | 2E-58   | 97.92%     | 142      | AGH70103.1     | 6                             |
| OBP8        | OBP 8                    | <i>Spodoptera exigua</i>     | 272       | 272         | 48%         | 5E-89   | 99.31%     | 149      | AGH70104.1     | 6                             |
| OBP9        | OBP 9                    | <i>Spodoptera litura</i>     | 319       | 319         | 99%         | 5E-107  | 98.08%     | 339      | ALD65883.1     | 5                             |
| OBP10       | OBP 10                   | <i>Spodoptera exigua</i>     | 309       | 309         | 99%         | 6E-106  | 95.54%     | 157      | AGH70106.1     | 5                             |
| OBP11       | OBP 11                   | <i>Apocheima cinerarius</i>  | 120       | 120         | 62%         | 3E-30   | 46.62%     | 155      | QOV03027.1     | 6                             |
| OBP12       | OBP 12                   | <i>Corythucha ciliata</i>    | 193       | 193         | 88%         | 8E-60   | 56.85%     | 160      | AYP30811.1     | 6                             |
| OBP13       | OBP 13                   | <i>Corythucha ciliata</i>    | 87        | 87          | 69%         | 2E-17   | 35.81%     | 167      | AYP30812.1     | 6                             |
| OBP14       | SexiOBP 14               | <i>Spodoptera exigua</i>     | 206       | 206         | 57%         | 7E-65   | 88.18%     | 139      | AGP03460.1     | 6                             |
| OBP15       | OBP 15                   | <i>Corythucha ciliata</i>    | 227       | 227         | 33%         | 3E-69   | 72.73%     | 177      | AYP30814.1     | 7                             |
| OBP16       | OBP 16                   | <i>Carposina sasakii</i>     | 268       | 268         | 98%         | 2E-89   | 78.18%     | 166      | AYD42191.1     | 5                             |
| OBP17       | OBP 17                   | <i>Spodoptera exigua</i>     | 258       | 258         | 94%         | 8E-86   | 91.85%     | 148      | AKT26495.1     | 4                             |
| OBP18       | OBP 18                   | <i>Spodoptera exigua</i>     | 317       | 317         | 99%         | 4E-108  | 79.03%     | 186      | AKT26496.1     | 1                             |
| OBP19       | OBP 19                   | <i>Spodoptera exigua</i>     | 224       | 342         | 54%         | 1E-66   | 65.16%     | 216      | AKT26497.1     | 5                             |
| OBP20       | OBP 20                   | <i>Spodoptera exigua</i>     | 228       | 228         | 68%         | 5E-73   | 78.91%     | 146      | AKT26498.1     | 5                             |
| OBP21       | GOBP 69a-like isoform X1 | <i>Spodoptera frugiperda</i> | 320       | 320         | 99%         | 3E-110  | 100.00%    | 154      | XP_035437860.1 | 6                             |

|             |         |                                 |     |     |     |          |         |     |                |   |
|-------------|---------|---------------------------------|-----|-----|-----|----------|---------|-----|----------------|---|
| OBP22       | OBP 22  | <i>Spodoptera exigua</i>        | 289 | 289 | 99% | 9E-98    | 94.87%  | 156 | AKT26499.1     | 4 |
| OBP23       | OBP 23  | <i>Spodoptera exigua</i>        | 479 | 479 | 99% | 5E-170   | 94.19%  | 252 | AKT26500.1     | 0 |
| OBP24       | OBP 24  | <i>Spodoptera exigua</i>        | 324 | 324 | 99% | 2E-111   | 100.00% | 184 | AKT26501.1     | 6 |
| OBP25       | OBP 25  | <i>Spodoptera litura</i>        | 195 | 195 | 98% | 6E-61    | 68.67%  | 154 | ALD65899.1     | 7 |
| OBP26       | OBP 26  | <i>Spodoptera exigua</i>        | 201 | 310 | 53% | 2E-58    | 90.08%  | 149 | AKT26503.1     | 6 |
| OBP27       | OBP 9   | <i>Cnaphalocrocis medinalis</i> | 281 | 281 | 75% | 5E-93    | 77.50%  | 204 | ALT31639.1     | 5 |
| OBP28       | OBP 59a | <i>Spodoptera frugiperda</i>    | 227 | 227 | 85% | 3E-72    | 97.69%  | 244 | XP_035435754.2 | 5 |
| OBP29       | OBP 29  | <i>Spodoptera litura</i>        | 255 | 357 | 99% | 1E-82    | 95.38%  | 156 | ALD65903.1     | 7 |
| OBP30       | OBP 1   | <i>Carposina sasakii</i>        | 171 | 171 | 78% | 4E-52    | 71.30%  | 107 | AYD42176.1     | 5 |
| OBP31       | OBP 31  | <i>Plutella xylostella</i>      | 171 | 171 | 76% | 7E-52    | 72.64%  | 136 | ANG08529.1     | 6 |
| OBP32       | OBP 32  | <i>Plutella xylostella</i>      | 216 | 216 | 99% | 7E-70    | 78.95%  | 136 | ANG08535.1     | 4 |
| OBP33       | OBP 33  | <i>Helicoverpa armigera</i>     | 171 | 171 | 64% | 3.00E-52 | 82.83%  | 99  | ASA40071.1     | 6 |
| <b>CSPs</b> |         |                                 |     |     |     |          |         |     |                |   |
| CSP1        | CSP 1   | <i>Mythimna separata</i>        | 248 | 248 | 95% | 1.00E-78 | 70.80%  | 290 | AWT22249.1     | 0 |
| CSP2        | CSP 2   | <i>Pieris rapae</i>             | 162 | 162 | 95% | 2.00E-49 | 76.70%  | 100 | QDW65468.1     | 4 |
| CSP3        | CSP 3   | <i>Spodoptera frugiperda</i>    | 224 | 224 | 99% | 3.00E-73 | 98.43%  | 127 | QXT24549.1     | 4 |
| CSP4        | CSP 4   | <i>Spodoptera exigua</i>        | 190 | 190 | 99% | 9.00E-60 | 82.93%  | 123 | AKT26481.1     | 4 |
| CSP5        | CSP 5   | <i>Spodoptera exigua</i>        | 124 | 124 | 87% | 2.00E-34 | 90.77%  | 131 | AKT26482.1     | 4 |
| CSP6        | CSP 6   | <i>Spodoptera exigua</i>        | 129 | 129 | 81% | 8.00E-36 | 59.57%  | 111 | AKF42439.1     | 4 |
| CSP7        | CSP 7   | <i>Spodoptera exigua</i>        | 212 | 212 | 99% | 3.00E-68 | 89.84%  | 128 | AKT26484.1     | 4 |
| CSP8        | CSP 8   | <i>Conogethes punctiferalis</i> | 183 | 183 | 98% | 5.00E-57 | 70.59%  | 120 | AHX37222.1     | 4 |
| CSP9        | CSP 9   | <i>Spodoptera exigua</i>        | 253 | 253 | 99% | 7.00E-85 | 97.56%  | 123 | AVC68635.1     | 4 |
| CSP10       | CSP 10  | <i>Spodoptera exigua</i>        | 230 | 230 | 73% | 6.00E-75 | 100.00% | 122 | AKT26486.1     | 4 |
| CSP11       | CSP 11  | <i>Spodoptera exigua</i>        | 208 | 208 | 85% | 7.00E-67 | 94.29%  | 122 | AKT26487.1     | 4 |

|       |                 |                                    |     |     |     |          |        |     |            |   |
|-------|-----------------|------------------------------------|-----|-----|-----|----------|--------|-----|------------|---|
| CSP12 | CSP 12          | <i>Spodoptera exigua</i>           | 187 | 187 | 86% | 2.00E-58 | 80.00% | 125 | AKT26488.1 | 4 |
| CSP13 | CSP 13          | <i>Spodoptera exigua</i>           | 223 | 223 | 99% | 5.00E-73 | 92.68% | 123 | AKT26489.1 | 4 |
| CSP14 | CSP 14          | <i>Heortia vitessoides</i>         | 147 | 147 | 86% | 1.00E-42 | 62.26% | 128 | UVB79217.1 | 4 |
| CSP15 | CSP 15          | <i>Adelphocoris<br/>lineolatus</i> | 206 | 206 | 79% | 3.00E-65 | 79.37% | 126 | AXS78221.1 | 4 |
| CSP16 | CSP 16          | <i>Spodoptera exigua</i>           | 234 | 234 | 80% | 2.00E-76 | 91.80% | 122 | AKT26491.1 | 4 |
| CSP17 | CSP 17          | <i>Spodoptera exigua</i>           | 199 | 199 | 99% | 3.00E-63 | 93.44% | 122 | AVC68636.1 | 4 |
| CSP18 | CSP CSP18       | <i>Lobesia botrana</i>             | 148 | 148 | 86% | 3.00E-43 | 63.21% | 127 | AXF48714.1 | 4 |
| CSP19 | CSP 19          | <i>Spodoptera exigua</i>           | 195 | 195 | 86% | 9.00E-62 | 86.79% | 122 | AKT26493.1 | 4 |
| CSP20 | putative CSP 23 | <i>Conopomorpha<br/>sinensis</i>   | 174 | 174 | 73% | 1.00E-48 | 93.02% | 557 | QGN03668.1 | 4 |
| CSP21 | putative CSP 9  | <i>Corcyra cephalonica</i>         | 218 | 218 | 99% | 1.00E-69 | 62.75% | 154 | UDM59702.1 | 4 |
| CSP22 | CSP 4           | <i>Athetis dissimilis</i>          | 239 | 239 | 85% | 6.00E-78 | 76.87% | 151 | AND82446.1 | 4 |

---

**Supplemental Table S2. Orthologues of *OBP* between *S. frugiperda* and *S. litura* that are located in the same subclades with highest similarities**

| <i>S. frugiperda</i> | <i>S. litura</i> |
|----------------------|------------------|
| <i>SfruOBP19</i>     | <i>SlitOBP13</i> |
| <i>SfruOBP29</i>     | <i>SlitOBP30</i> |
| <i>SfruOBP5</i>      | <i>SlitOBP5</i>  |
| <i>SfruOBP25</i>     | <i>SlitOBP25</i> |
| <i>SfruOBP26</i>     | <i>SlitOBP22</i> |
| <i>SfruOBP6</i>      | <i>SlitOBP6</i>  |
| <i>SfruOBP14</i>     | <i>SlitOBP28</i> |
| <i>SfruOBP21</i>     | <i>SlitOBP26</i> |
| <i>SfruOBP17</i>     | <i>SlitOBP27</i> |
| <i>SfruOBP18</i>     | <i>SlitOBP18</i> |
| <i>SfruOBP22</i>     | <i>SlitOBP33</i> |
| <i>SfruOBP32</i>     | <i>SlitOBP12</i> |
| <i>SfruOBP8</i>      | <i>SlitOBP21</i> |
| <i>SfruOBP31</i>     | <i>SlitOBP3</i>  |
| <i>SfruOBP7</i>      | <i>SlitOBP17</i> |
| <i>SfruOBP27</i>     | <i>SlitOBP31</i> |
| <i>SfruOBP20</i>     | <i>SlitOBP19</i> |
| <i>SfruOBP30</i>     | <i>SlitOBP20</i> |
| <i>SfruOBP16</i>     | <i>SlitOBP32</i> |
| <i>SfruOBP28</i>     | <i>SlitOBP1</i>  |
| <i>SfruOBP9</i>      | <i>SlitOBP9</i>  |
| <i>SfruOBP24</i>     | <i>SlitOBP10</i> |
| <i>SfruOBP2</i>      | <i>SlitGOBP2</i> |
| <i>SfruOBP15</i>     | <i>SlitGOBP1</i> |

**Supplemental Table S3. Orthologues of CSP between *S. frugiperda* and *S. litura* that are located in the same subclades with highest similarities**

| <i>S. frugiperda</i> | <i>S. litura</i> |
|----------------------|------------------|
| <i>SfruCSP21</i>     | <i>SlitCSP23</i> |
| <i>SfruCSP8</i>      | <i>SlitCSP13</i> |
| <i>SfruCSP6</i>      | <i>SlitCSP11</i> |
| <i>SfruCSP2</i>      | <i>SlitCSP4</i>  |
| <i>SfruCSP20</i>     | <i>SlitCSP3</i>  |
| <i>SfruCSP10</i>     | <i>SlitCSP12</i> |
| <i>SfruCSP16</i>     | <i>SlitCSP10</i> |
| <i>SfruCSP19</i>     | <i>SlitCSP6</i>  |
| <i>SfruCSP4</i>      | <i>SlitCSP7</i>  |
| <i>SfruCSP5</i>      | <i>SlitCSP8</i>  |
| <i>SfruCSP17</i>     | <i>SlitCSP14</i> |
| <i>SfruCSP13</i>     | <i>SlitCSP5</i>  |
| <i>SfruCSP12</i>     | <i>SlitCSP1</i>  |
| <i>SfruCSP11</i>     | <i>SlitCSP9</i>  |
| <i>SfruCSP9</i>      | <i>SlitCSP17</i> |
| <i>SfruCSP7</i>      | <i>SlitCSP16</i> |
| <i>SfruCSP14</i>     | <i>SlitCSP18</i> |
| <i>SfruCSP18</i>     | <i>SlitCSP21</i> |
| <i>SfruCSP3</i>      | <i>SlitCSP20</i> |
| <i>SfruCSP22</i>     | <i>SlitCSP22</i> |
| <i>SfruCSP15</i>     | <i>SlitCSP15</i> |

**Supplemental Table S4. Homologous *SfruOBPs* and *SfruCSPs* in this paper and previous report**

| Gene name in<br>previous<br>(Legeai et al.,<br>2014) | Sf_TR2012b ID    | Gene name in<br>this paper | Annotation of<br>inconsistent genes                                                                                                                                                | identity of<br>between two<br>papers |
|------------------------------------------------------|------------------|----------------------------|------------------------------------------------------------------------------------------------------------------------------------------------------------------------------------|--------------------------------------|
| OBPs                                                 |                  |                            |                                                                                                                                                                                    |                                      |
| GOBP1                                                | c7994            |                            | Select seq<br>ref XP_035439875.2 <br>partner of Y14 and<br>mago [ <i>Spodoptera<br/>frugiperda</i> ]<br><i>Spodoptera<br/>frugiperda</i>                                           |                                      |
| GOBP2                                                | joint2_rep_c3475 | OBP2                       |                                                                                                                                                                                    | 98.77%                               |
| OBP1                                                 | rep_c2034        | OBP18                      |                                                                                                                                                                                    | 100%                                 |
| OBP2                                                 | joint2_rep_c9255 | OBP24                      |                                                                                                                                                                                    | 99.36%                               |
| OBP3                                                 | rep_c490         |                            | Select seq<br>ref XP_035458708.2 <br>GPI<br>mannosyltransferase<br>3 [ <i>Spodoptera<br/>frugiperda</i> ]<br><i>Spodoptera<br/>frugiperda</i>                                      |                                      |
| OBP4                                                 | rep_c877         | OBP32                      |                                                                                                                                                                                    | 99.25%                               |
| OBP5                                                 | rep_c2055        | OBP10                      |                                                                                                                                                                                    | 96.18%                               |
| OBP6                                                 | c15965           | OBP1                       |                                                                                                                                                                                    | 100%                                 |
| OBP7                                                 | rep_c571         | OBP8                       |                                                                                                                                                                                    | 100%                                 |
| OBP8                                                 | joint2_rep_c7287 | OBP23                      |                                                                                                                                                                                    | 99.59%                               |
| OBP9                                                 | Not found        |                            |                                                                                                                                                                                    |                                      |
| OBP10                                                | c11418           | OBP28                      |                                                                                                                                                                                    | 97.95%                               |
| OBP11                                                | joint2_rep_c104  | OBP6                       |                                                                                                                                                                                    | 98.4%                                |
| OBP12                                                | rep_c504         |                            | Select seq<br>ref XP_035454964.2 <br>armadillo<br>repeat-containing<br>protein 6 homolog<br>isoform X2<br>[ <i>Spodoptera<br/>frugiperda</i> ]<br><i>Spodoptera<br/>frugiperda</i> |                                      |
| OBP13                                                | c32728           | OBP19                      |                                                                                                                                                                                    | 98.65%                               |
| OBP14                                                | joint2_c2406     | OBP7                       |                                                                                                                                                                                    | 77.27%                               |

|       |                  |                                                                                                                                   |        |
|-------|------------------|-----------------------------------------------------------------------------------------------------------------------------------|--------|
| OBP15 | joint2_rep_c3798 | OBP7                                                                                                                              | 100%   |
| OBP16 | Not found        |                                                                                                                                   |        |
| OBP17 | rep_c44968       |                                                                                                                                   | 97.87% |
|       |                  | Select seq<br>ref XP_050560119.1 <br>titin isoform X1<br>[ <i>Spodoptera frugiperda</i> ]<br><i>Spodoptera frugiperda</i>         |        |
| OBP18 | rep_c2988        |                                                                                                                                   |        |
| OBP19 | Not found        |                                                                                                                                   |        |
| OBP20 | Not found        |                                                                                                                                   |        |
| OBP22 | joint2_rep_c1191 |                                                                                                                                   | 89.23% |
| OBP23 | rep_c3716        | OBP6                                                                                                                              | 99.17% |
| OBP24 | joint2_c2045     | OBP6                                                                                                                              | 91.3%  |
| OBP25 | joint2_c2317     |                                                                                                                                   | 72.8%  |
| OBP26 | rep_c2960        | OBP21                                                                                                                             | 100%   |
| OBP27 | c28274           | OBP33                                                                                                                             | 92.16% |
| OBP28 | joint2_c6322     | OBP28                                                                                                                             | 99.07% |
| OBP29 | joint2_rep_c3596 | OBP29                                                                                                                             | 95.65% |
|       |                  | Select seq<br>gb AEA76329.1 <br>chitin binding domain<br>3 protein [ <i>Mamestra configurata</i> ]<br><i>Mamestra configurata</i> |        |
| OBP30 | rep_c4239        |                                                                                                                                   |        |
| OBP31 | Not found        |                                                                                                                                   |        |
| PBP1  | joint2_c4216     | OBP4                                                                                                                              | 99.39% |
| PBP2  | rep_c1860        | OBP3                                                                                                                              | 99.42% |
| PBP3  | rep_c5672        | OBP12                                                                                                                             | 99.39% |
| CSPs  |                  |                                                                                                                                   |        |
| CSP1  | joint2_rep_c612  | CSP7                                                                                                                              | 99.22% |
| CSP2  | joint2_rep_c3099 | CSP8                                                                                                                              | 100%   |
| CSP3  | Not found        |                                                                                                                                   |        |
| CSP4  | joint2_c3581     | CSP22                                                                                                                             | 94.38% |
| CSP5  | rep_c3130        | CSP18                                                                                                                             | 94.81% |
| CSP6  | joint2_rep_c2279 | CSP9                                                                                                                              | 99.19% |
| CSP7  | joint2_c1683     | CSP20                                                                                                                             | 98.1%  |
| CSP8  | rep_c4613        | CSP3                                                                                                                              | 96.06% |
| CSP9  | rep_c23815       | CSP14                                                                                                                             | 99.17% |
| CSP10 | c10036           | CSP1                                                                                                                              | 77.88% |
| CSP11 | joint2_c9626     | CSP6                                                                                                                              | 99.12% |
| CSP12 | joint2_c1394     | CSP4                                                                                                                              | 100%   |

|       |              |                          |        |
|-------|--------------|--------------------------|--------|
| CSP13 | rep_c3399    | CSP17                    | 99.18% |
| CSP14 | joint2_c3078 | CSP15                    | 94.25% |
| CSP15 | rep_c4149    | CSP5                     | 96%    |
| CSP16 | joint2_c2765 | CSP19                    | 96.72% |
| CSP17 | rep_c28057   | CSP10                    | 85.16% |
|       |              | <i>Gossypium</i>         |        |
|       |              | <i>herbaceum</i> isolate |        |
|       |              | GPA1alz                  |        |
| CSP17 | rep_c475     | chromosome 5             |        |
|       |              | <i>Gossypium</i>         |        |
|       |              | <i>herbaceum</i>         |        |
| CSP18 | joint2_c9032 | CSP16                    | 98.55% |
| CSP19 | rep_c601     | CSP13                    | 99.19% |

---

**Supplemental Table S5. Protein and nucleic acid sequences of *SfruOBPs* and *SfruCSPs***

---

**Protein sequences of *SfruOBPs***

---

>*SfruOBP1*

MTLIKKKSKFGEIVKRTVIATAHTCMDHVNATTKDLEHLRDEPPYPETSACIVKCLLEKIGVVKS  
NRYSKMGFMTAVTPLVFANKKKMEHMKTVSENCDEKVNHHKHETPCQLGNEVTTCIFKYAPELHFK  
S

>*SfruOBP2*

MTSKCCLLLVVMATVTSSVMATAEVM SHVTAHF GKALEECREESGLSAEVLEE FQHFWREDFEVV  
HRELGCAIICMSNKFSLQDDSRMHVNMHDYVKSFPNGHVLSEKLVELIHNCEKKFDSMTDDCE  
RVVKVAACFKVDAKAAGIAPEVAMIEAVMEKY

>*SfruOBP3*

MTLRQSGTMSVRVALVVALVVAASLLVVQASQDVMKNLAINFAKPLDDCRKEMDLPDSVTTDFYN  
FWKEGYELTNRTGCAILCLSSKLEILDQELNLHHGRAQEFAMKHGADEAMAKQIVDMIHTCAQS  
TPDVAADPCMKTNLVAKCFKDKIHELNWAPSMELVVGEVLAEV

>*SfruOBP4*

MADARWRVVCVVCALCLTSAVLASQDLMVKMTKGFSKVVDCKTELNIGDHIMQDMYNYWREEYQ  
LINRDMGCMVLCMAKKLDLMEDQKMHGKAEEFAKSHGADDDVAKKLVSI IHECEQQHAGVADEC  
MRALVAKCFRTKIHELKWAPSMEVIMEEMMTAV

>*SfruOBP5*

MFVVRCSFVVALFCLVSVYAQSDEEAGIKEALRPFVEECADEFGITEEQFEEAKKKGNAADIDP  
CFMSCFLKKAGFFDSQGKFDVDSTMAFAKDHVSSEPAMKFVEAVGDECVKINDEDVSDGDKGCDR  
AKLLFDCIGETKKKME

>*SfruOBP6*

MSKFACLVLCVAVSLSGVHATAE EKA AFIEAVKPHIQECSKEHGVTPEEIKSAKAAGNADGINS  
CFLSCVYKKA EVINDKGEYDADKALEKLKKFVSNEDDYAKFAEIGKKCASVNEKSVSDGDAGCER  
AALLTTCFLEHKSEIPA

>*SfruOBP7*

MTRQQLKNSGKLMKKSCMPKNDVTEDEVGDIEKGKFIESRNVMCYIACVYTMTQVVKNKLSYEA  
VIKQVDVMFPAEMRDAVKAAATHCKETTKKYKDLCESSYWTAKCMYDYDAENFVFP

>*SfruOBP8*

MARRQRGAMFTETLPLFVILVAVTHGGKDKPVFSDEIKEIIQTVHDECVAKTGVAEEDITNCENG  
IFKEDAKLKCVMFCLLEEASLVDDDDTVDYDMLVSLIPDEYYERTTKMIFACKHLDTDPDKRCQR  
AFEVHKCSYEKDPDLYFLF

>*SfruOBP9*

MGQYNNNYSTTQSSRRYKRERRPSNSGQRSQYNPN SHKISGYEDNFRSDERNNTENNSSKETDN  
KSCALHCFLENLEMTGEDGMPDRYLVTHAITKDVKNEDLRDFLQESIEECFQILDNENTEDKCEF  
SKNLLICLSEKGRANCDDWKDDLTF

>*SfruOBP10*

MTKVLFAIVLTMITFAVALSASTKEAQTTMSDQVNSIEVDVLAVMDMCNDSYRIDPTYLQALNE  
SGSFIDETDKTPKCFIRC VFENVGIVSE DGKQFNPARAAVIFAGERNGKPMEDIADMTALCATDR  
QETCPCDRSYKFLRCLMSMEIEREYKS

>*SfruOBP11*

MCKFRVLLLGFVAVVYF SHVNCLYDEDKKILRDGLESIAHDC LHGCGIDETEIENIEADDNVDQ

CFKKCVMTDAGFALSDREKSTIQKELTTVGLQCIQQHPLSLSDIRSFNKMIPDGKKPKCFVACL  
FKKIGVMDDMGMISPMKAEENAKKVFKDNEEHKHKVNEIMEKCSSVNHQNTSDGNKGCDRAKLAF  
NCFTENADRYGDFDF

>SfruOBP12

MGSCNVFVALVVLTVGVREIEPSKDAMKYITSGFVKVLEECKQELNMNDHIIADLFHYWKLEYTL  
LNRDTGCAIICMSKKLELLDANGRMHHGNAQEFAKKHGAGDEVASKIVQIIHECEKKHERDDDEC  
LRVLEVAKCFRTGIHELWDWQPKVEVIVEEVLTEM

>SfruOBP13

MLGMKTIVVLCLIVYEAGLVHGEHEVSVLRALSTSIGDTLLECQTELDIKNEVIQSFLNFWDLKN  
PADTKEWGCALDCVQKNAFLTPDGKTVISANVREFCKAAGADELMSVRMVDLFEMCKDGAKKII  
SKCDNALEVTKCFRHGIVQLDWAPEHNFWRNRTREHPDNI PVQRTDIVKIPLPQRHSSLNVWRRRF  
GYRRLASILRRSFC

>SfruOBP14

MMRKTCPKNNVEDEKIDPIADGVFIDEKEVKCYMACIMKMANTIKNGKLNVDAAIKQADLLLDP  
DIKEPAKEAITACRKVGMDCNIEHPITPKEMLELKDNKIPDTNNAKCFVACVFKKTGMLDSKGM  
DAENSIAMTQKDFANDPKRLEGSKKLETCCKVND EAVSDGEKGCERSVLLHKCFVETAPQ

>SfruOBP15

MLLLLRLALPLLA AVLPLRADVNVMKDVTLGFGQALDKCRQESQLTEEKMEEFFHFWRDDFKFEHR  
ELGCAIQCMSRHFNLLTDSSRMHHENTEQFIQSFPNGEVLARHMVELIHACEKQHDHEEDHCWRI  
LHVAECFKQACVQRGVAPSMEMMMTEFIMEAEAR

>SfruOBP16

MEKILIFTTFLSLAVVNSFKTKFFSQSLDSEPPVSILYARDKKSDKVTDDCLTEMYPRNLYKYP  
LRIDRNDIPCI IHCVLKKFGIMTNDGYINIKNYRRVQAIHRYDPRILISDVGETCAQNINGMNL  
DHDVCKKAKVFNDCTQLYAVSYKDPDEWK

>SfruOBP17

MAQHCCNASHADVQTPTKRETRASLKPLSVCCDIPELADERQLSKCSPKPPGPCEDVQCIFEAS  
GFLTDKNTLNKAAYRSHLQKWEKSNPGWTD AIYKAITDCVDNDPRQHLDVACKAYDVFTCTGIAM  
LKKCPETAWKC

>SfruOBP18

MFKFCVFLALGFVACHGAPNTNPGTYCGATPDNMFRC LNNPRVVTPEVAAKCGSQVTECERMTCI  
FRELKWSKKGAI DAKAVRAYFEQYETEHPDWAQAVQHVKSFCLVPELRAQGVFLNCPAYDIMQCI  
LSSFIKHASPSVWSNATDCDYPKAFAAACPVCPSDCYSPQIPFGSCNACYSQPRTV

>SfruOBP19

MITSSSLVLAAVVQVLFAQEPAFESGPPEPWGPPEKQTPRLAPRI PRNCWAPPQRINVYKCCP  
IPSLYPDEAMQSCGFEKLPEGEAPKAVYRPEGTCKEGYCVMKFNLL LANKSVDYEFKGNYLDS  
WAEANPEFAKPIKLAKEECAKDEGPKGPPICDPDRIFLCLTSII FWNCDLRDGEGCSALQEHMNE  
CRQYYTR

>SfruOBP20

MFRRALLFLSVIYSLQYCNGQTEAPEKNRMMGIDAVHDNNVKIDKDTI ITRNLKLEKRN RGPKSD  
SNKNVDEKEPDWSYASFPKEISEHVENFKNMSECLKEVQSSDKRPVKRLSPKMESPVHGECLIA  
CVLKRNGV I IHGKVNKDNLIALVSKFYSKDTRLMKKLEKNLDRCIEMSVRAQDDCTLASLLNDCT  
NDLMASNKHKLTVNY

>SfruOBP21

MFKLSVFCCLYFCALTPYLVSAMTAEQKAI IHEHFETIGKACNKDSTVITADDDVVNL RARKMPS

GPNAPCFLACMMKQIGIMDDNGMVQKENVLEMAKAVFDDPEELKAIEDYLHSCSQVNTESVSDGA  
 AGCERAMLAYKCMENASKFGFDI  
 >SfruOBP22  
 MTCSQALALLALVAISQQATTGCKNCIMLGKEEKAMFRAHSDACVAASRVEPRLVDAMLAGELLD  
 EPALRRHVYCVLLKCKLISKDGKLQKAAVLGKMAARPDANKVLESCADQTDGTPEDLAWNLF  
 RCGYDKKALLFDYMPNTNVASETDNNS  
 >SfruOBP23  
 MILSVCYGAVDIKKYFKVCDRNAIDVNDMAEAVRQGIATMINGIDELGVPPIDPYLQKEFRMEY  
 KNNQIAAKLNLKNIYVEGLKEAIVHDARLRADDDKFHLEVDLSGPRVSVKADYYGEGQFNSLKIV  
 AYGQVNTTMTDLVYTWKLDGVPEKNGTETYIRITDFYMRPDLGSIVTLFKNDNPESRELTDLGTR  
 FANENWRTLYKEFLPYAQANWKRIGVRVANKLFLKVPYDQLFPTSS  
 >SfruOBP24  
 ESRCRNPPTAPQKIERVITLCQDEIKLSILREALDVIKEEHTMPAQRRRDKREVPFTHDEKRIAG  
 CLLQCVRKVKAVDGYGFPTLEGLVGLYSDGVNERGYFMAVLEASRECLMKNHDKFSRTVPMNG  
 RNCDSVDFIFECISDRIGEYCGTSGL  
 >SfruOBP25  
 MAKVTCILLFVAVSLSSVQTDESQNSSEVDADVDKVIDECAKEFHVPHQLLMAAVTTGSHALT  
 PCFWSCCFKGVGLNSEGQYDIDATLDLSKKMFSGSEYQKVEGIVKSCGSVNDISVSDGKAGCEI  
 SVSLAVCILDNCKKIFPNMFHD  
 >SfruOBP26  
 GCERAVLGAICYMEHKTQAAVSEEEKEAFREAMAPIIAECSEEHGVSEADIKAAKEAASADGIK  
 PCFLGCMKKIEVLDSKGLYDAETGLGKLKFKVKDEADFAKFEEIAKKCLKVNEESVSDGEEGCE  
 RAKLILGCFIDHKVEMPF  
 >SfruOBP27  
 MKYKTRRTRNEREQEKMHLQONIFALILFILFSFAFYLTISFTPLTKEEQMERYNKMTENVEPFR  
 KNLTECARQVKASMADVENFIKRIPQASLQGKCFVACILKRNSIIKNNKISKEHLLLEANKAVYGE  
 DSEVMARLKTAVGECTQVVEGIFEVCEYASVFNDCMHIKMEHILDKVTMERRMEAIGKMTSNPDQ  
 WNEEEDELLKLVKDEL  
 >SfruOBP28  
 MVGAVALALLPALVAGAGEGNIKLEDEVAVALKSCTYPDDITNSKEPASKERQRRSEDSYDAS  
 PRIDDNVKEGNRYSHERRISNDSGDQLMVINATDDDYSGYGSGNMGEKLLTSVPRPASPNNNINK  
 NNTSRTRRNEPLLNRPDSDQCLSQC VFANLQVVD SRGIPREAE LWNKVQSAVTSQQSRSALHDQI  
 RACFQELQSEAEDNGCSYSNKLERCMLRFADRKVDGKGNAKKSSKEQT  
 >SfruOBP29  
 MWNSLFFLFTFGVFSLNAAEALTMDDLKQKYVDNILECSKQYPVDRADAEQLQNRIMPDKESVRCL  
 FACVYKLAGMMNDQGELSVEGVNAISRKYLAEDPEKLKKSEQFTEACRSVNDAPVNDGTRGCDRA  
 ALIFQCTIDKSPDGLTEEELKMEFTKLVMKCNKDGQMDMTLVQLQNYVVP TKQSAKCVLACAYK  
 AA EVMNAKGEYDIDHAYKVAEMMKNNGDEKRLVNAKKMADLCVKVNENSVSDGEKGC DRAAMIFKC  
 TVENAPKFGFKL  
 >SfruOBP30  
 MVDKILIFTFITLSGFAHARMSV MYAHDKLSDIVAQQLSEMYPKNRRRIEQESDEPCIIFCVLK  
 KFGIISATGVINLEVYRKRVLIAHQLDQNTSVMDNGGSCMENAEATQHKQDVCKKAKVFNDCTHL  
 YRILLM  
 >SfruOBP31

MWTQALVLTGALASLAAAEMDEDMaelarmVRDNCAGETGVDVALVEQVNAGADLMPDEKLK  
 CYIKCTMETAGMMADGEVDIEAVLALLPPSLADQHAPSLRACGTQRGADHCDTAFRTQQCWQKAN  
 KADYFLI  
 >SfruOBP32  
 MKTLLVFAACILLAHALTDEQKEKLKKHRSECLTETNVDEQLVNKLKGGDYKTESEPLKKYALCM  
 MMKSELMTKDGKFKKDVALAKVPNPADKPTVEKLIDACLANKGNTPHQTAWNYVKCYHEKDPKHA  
 IFL  
 >SfruOBP33  
 MFKSGVVYICIVVAVFFKNALAITDELKSHIEAKFLTVGAECIKEHPLTIEDLSAFKNRVFPEGEN  
 AGCFSACIFNKLGLFDDKGSLSHLTALENAAKVFEDQGELENIEKFLTTCAKVNDEEVSDGEKGC  
 ERAKLAYNCFIENYEQLGFDLEF

---

**Protein sequences of SfruCSPs**

---

>SfruCSP1  
 MVRLKVKIGILPEALRTKCVRCterQKRTAVKVIKRLKNEYPDewSKLASRWDPtGDFTRYFEEF  
 LAKEHYNTIPGSGSALPTSSPLAPPRVPQSVpATTPTPGPTESPPRPiVLNRFGGDGELMMGSP  
 SSAGVTPRPMtQATTPSTTTKpSTTTKSPSTRVPVPRPTMMTWAGAASNTQSTRFPLRPVSEMS  
 PPYSTAITFIDQIGYKIIRTTelVTDIVRNTVRAVVGR  
 >SfruCSP2  
 MQIILVLIVACVGLAAGLHVQAGPQMTDAQLEQTLADKSTMQRHIKCALGEGPCDPVGRRLRTLA  
 PLVLRGACPQCSMQETRQIRRTLAfVQRNYPWEWAKIVRQYG  
 >SfruCSP3  
 MKSMLVLCVLSVAALVVARPEDHYTDryDNVNLDEILSNRRLLPYVKCTLDQgKCAPDAKELKE  
 HIREALENECGKCTETQKKGTRRVIEYlinNEEAYWNELtAKYDPERKYTVKYESELKKIKA  
 >SfruCSP4  
 MKCIYVLSALLVFAAVQAEDKYSTENDDLIDAVVADVDALRGFVGCFMDSVTCHAVAADfKKDL  
 PEAVATSCSKCTEAQKHIFHRfLLGLKQKLpADYEAfKKKfDPEGQHfHALEANVSNS  
 >SfruCSP5  
 MNGANKYNFGLLLIFMCLFIATVVSQEKfyDRryDYIEIDTLIqNPRLlKKYLDCFLWRGPCTPI  
 GRVFRQILPEAVQTACKKCTQSQRRlARKTFDAfKGyFPEIHEELRKRLDPKNKYyEAFekaISS  
 A  
 >SfruCSP6  
 MKVLVVLsvFLALAAAAPPKpITKEELAILEAFDYDAVFANEESRKLIFDCLLDKGDCGPYKKV  
 ELSKSMYDECALCSPTQMAKYDRVLKLLHDDYETfYNELIKKVASEKE  
 >SfruCSP7  
 MKFVLVLCLVAAAVLADDDKYTSKYDNIDLDEILSNKRLLTAYVNCVMERGKCSPEGKELKEHLV  
 DAIETGCKKCTEAQEKgAYKVIEHLIQHELDTWRELCDKYDASGKWRKTYEDRAKANGIVIE  
 >SfruCSP8  
 MKVALLTLcfALGVLAQDMYENANDNFDisEVLGNERLLNSYAKCLLNKGpCTPEVKQVKDKLPE  
 ALETRCAKCTDKQKQMGKTLAQEVKKNHPDIWKQLVEMYDPEGKYQQAWKDFLQE  
 >SfruCSP9  
 MNFLVLSIVVTMAAFVAAETyTDryDHINIDEIIENRKLlVPYIKCTLDQGRCTPEGRELKAHIK  
 DAMQTSCSKCTEKQKKGARKVVRHIRAKEQDYWKQILAKYDPEDQYKENYESFLAAED  
 >SfruCSP10

MGPQPSKPGIATVDAARGALAQLSFGKYFSIKSFLESAVKVFINMRSWLLCLCVLTVVSCYSQA  
 NRYENFNPDAIVQNDRILLAYYKCVMDKGPCTRDGKNFKRVLPETLATA CGRCNPKQKTIVRKLL  
 LGIRSKSEPRFLELLDKYNPDRSNRDALYAFLVTGA  
 >SfruCSP11  
 MRVLVALSCLVVVALAADKYNKYDNFDVDTLISNDRLLKAYINCFLDKGRCTPEGSDFK  
 KALPEAIETTCAKCTEKQKGNIRKVIKAIQQKHPKEWEDLVKKNDPSEKHANFDKFLQG  
 SS  
 >SfruCSP12  
 MKLVIILALVAVAVARPDDGGTYDSKYDNFNVDELVG NARLLKSYAHCFLDDGKCTPEGNDFFKKW  
 IPEATTTSCGKCSEKQKALVAKTIQAIKDKLPAEYEALIKKHDPENKHQGLQEFLQKYSH  
 >SfruCSP13  
 MKSILVLCLLVA AVSCKPETYDTRYDNFDVESLVGNVRLLTAYGHCF LGNGPCTPEGSDFKKTIP  
 DALRTGCGKCSPKQRHLIRVVVAGFQSKTPDLWQQLVKKEDPNGQYKEIFTRFLNARD  
 >SfruCSP14  
 MKVVFLVCVLA AVVYGEQYTDKYDNIDLDEILHNEKILQSYVNCCLDQGKCTPDGKELKSHIKEA  
 LENRCAKCTDAQKRGTEKVLKFLINNKPDIDWQLCNKFDPEGLYRKKYEQEQYSAKQ  
 >SfruCSP15  
 MQYIFRYGRDEGVTAQRRVERS SREIRYKMKLIIVLALCVVGVAWARPASTYTDKWDNIN  
 VDEILESQRLLKGYVDCLLERGRCTPDGKALKETLPDALEHECSKCTEKQKKSSDKVIRF  
 LVNKRPD LWQELSGKYDPENIYQERYKTQLEAAKKH  
 >SfruCSP16  
 MYGIKLDEWWLQPSIPLGHRIIHIDTKFNMNALLIAVFALAAPLAYGYDEKYDKIDVDKI  
 LGDDALFTTYINCMLDKGPCSVEHSADFRQLLEVIATACEKCNAIQ RQNVKTKV KALSE  
 KKPDEFAQFRAKFD PKGEYEKAFAFAVIGTD  
 >SfruCSP17  
 MKADCVLIMTLMAVVAADFYN SKYDNFDVQPLENDRI LLSYTKCF LDQG PCTPD AKDFKKI IPE  
 ALETT CGKCS PKQKQLIRTVIKAVIAKHPEAWEQLSDKYDKDKKYKDSFDFKFLAEQE  
 >SfruCSP18  
 MGNYVEIIVLELKEDKLLTKALHREIMGLMDDSEVCNDTLEPHYMYTVFTMRS AVVLWNMIVEVT  
 LTVDSAVRQMKMSFIVLCLFGLAAVALAKPNGSTYTD RYDNVNLDEILGNRRL LTPYIKCILEEG  
 KCTADGKELKSHIREALEQNC AKCTDAQ RSGTRRVLGHLINNEEESWNRLKAKYDPQSKYTVKYE  
 LELKKLKQ  
 >SfruCSP19  
 MKFVLVVFVAAFAVMAEESYGTQYDNVNGEAIVSDDKQFQSIVDCFMGADSCNELAAAFKKVLP  
 EAIVQACAKCTSAQKHLARV FIEAYSKKMPQDYEFKDLFDPERKYFAKFEASVTGF  
 >SfruCSP20  
 MGNCCKSLPTMIKYALLLCCVAAVSVAQSQRPPVSDTALDDALQDKRFIQRQLKCALGEG  
 PCDPIGKRLKTLAPLVLRGACPQCTPQETKQIQRTLSYVQRNYPQQWAKIVRQYAG  
 >SfruCSP21  
 MWAQAIPYLIVVHVAMGEQKVP GFSREMSDGVESRGFKIIYGDEDMTIINQVVSEAEKGS AFKKR  
 VRLNEAIKPLPAQDVKCLMSVD RYCSKEMGMMKSVLIQAVKDDCAKCSVEQKDQAGKVIASMMAH  
 DPVAWKVFLTRYDGIKKVQRILG  
 >SfruCSP22  
 MASSYYSVLT VNETVISSAVPGMMKNSYKTMILLVYLT IQSNATETSTYTTKYDGIDLDEILDND

RLLTGYVNCLMDLGPCTADGKELKKNLPDAIDNDCKKCTERQREGADRVCHYLIDNRPEDWTKLE  
EKYKSDGSYRAKYLASKQTKDEKESNATKSSSEDNNVSKE

---

**Nucleic acid sequences of SfruOBPs**

---

>SfruOBP1

ATGACCCTCATAAAGAAAAAAGCAAATTCGGCGAGATAGTGAAGAGAACAGTCATCGCCACTGC  
ACACACATGTATGGACCATGTCAACGCCACAATAAGACCTGGAGCACCTTCGTGATGAACCGC  
CCTACCCAGAACTTCAGCTTGCATTGTTAAATGCTTACTAGAAAAGATCGGTGTTGTGAAAAGC  
AACAGATATTCGAAAATGGGTTTCATGACCGCCGTAACACCTCTAGTGTTCGCAAAACAAAAGAA  
AATGGAACACATGAAAACAGTGTGAGAAAACGCGACAAAGAGGTAAATCACAAACATGAGACGC  
CATGTCAACTTGGAAATGAGGTCCTACATGCATCTTTAAATACGCTCCCGAGCTACATTTTAAAG  
TCTTAA

>SfruOBP2

ATGACGTCGAAGTGTTGTTTGCTGCTGGTCGTCATGGCAACCGTCACCAGCTCGGTGATGGCCAC  
CGCCGAGGTGATGAGCCACGTCACCGCACACTTCGGGAAGGCTCTCGAGGAGTGCAGAGAAGAGT  
CAGGGTTATCAGCAGAGGTGCTGGAGGAGTTCAGCACTTCTGGCGCGAGGACTTCGAGGTGGTG  
CACCGCGAGCTGGGCTGCGCCATCATCTGCATGTCCAACAAGTTCTCGCTGCTGCAGGACGACAG  
CAGGATGCACCACGTCAACATGCACGACTACGTCAAGAGCTTCCCTAATGGCCACGTGCTATCGG  
AGAAGCTGGTAGAACTGATCCACAACGCGAGAAGAAGTTTCGACAGCATGACGGACGACTGCGAG  
CGCGTGGTGAAGGTGGCGGCCTGCTTCAAGGTGGACGCGAAGGCCGCGGCATCGCGCCCGAGGT  
GGCCATGATCGAGGCCGTCATGGAGAAGTACTGA

>SfruOBP3

ATGACGCTCCGGCAGTCGGGTACCATGTCGGTGAGGGTGGCGCTGGTGGTGGCGCTGGTGGTGGC  
CGCCAGTCTGCTGGTGGTGCAAGCCTCGCAAGATGTCATGAAGAACTTGGCCATCAATTTGCGCA  
AACCATTGGATGACTGTAGGAAGGAGATGGACCTGCCGGACTCGGTGACGACAGACTTCTACAAC  
TTCTGGAAGGAAGGCTACGAGCTGACGAACAGACAGACCGGCTGCGCTATCCTCTGTCTCTCCTC  
CAAGTTGGAGATTCTCGACCAGGAACGTAACCTACACCACGGCAGGGCACAAGAATTTGCCATGA  
AACACGGAGCTGACGAGGCCATGGCGAAGCAGATAGTGGACATGATCCACACGTGTGCGCAGTCC  
ACCCCGACGTGGCGGCCGACCCCTTGCATGAAGACCTGAATGTAGCCAAGTGCTTCAAGGACAA  
GATCCACGAGCTCAACTGGGCGCCCAGCATGGAACCTCGTCGTGGGAGAAGTACTGGCTGAAGTGT  
AA

>SfruOBP4

ATGGCGGACGCTAGATGGAGGGTTGTGTGTGTTGTGTGCGCGCTGTGCCTGACCAGCGCCGTGCT  
CGCCTCGCAGGACCTCATGGTCAAGATGACCAAGGGATTCTCGAAGGTCGTGGACGACTGCAAGA  
CTGAGCTGAACATAGGCGACCACATAATGCAAGACATGTACAACCTACTGGCGCGAGGAGTACCAG  
CTCATCAACCGGGACATGGGCTGCATGGTGCTGTGCATGGCCAAGAACTGGACCTCATGGAAGA  
CCAGAAGATGCATCACGGGAAGGCAGAAGAATTCGCCAAGAGTCATGGAGCTGACGACGACGTGG  
CCAAGAAGTTGGTGAGTATAATCCACGAGTGCAGAGCAGCAGCACGCCGGCGTGGCGGACGAGTGC  
ATGCGCGCGCTGGAGGTGGCCAAGTGCTTCCGCACCAAGATCCACGAGCTCAAGTGGGCGCCCAG  
CATGGAGGTCATCATGGAAGAGATGATGACCGCCGTATAA

>SfruOBP5

ATGTTCTGTTGTGAGATGTTCTCTTTTGTGGTGGCGCTGTTTTGTTTAGTGAGCGTTTATGCTCA  
ATCAGATGAAGAGGCAGGTATAAAAGAGGCTTTGCGCCCTTTTGTAGAAGAATGTGCAGATGAAT  
TCGGTATTACTGAGGAACAATTCGAAGAAGCAAAGAAAAAGGGCAATGCTGCTGATATCGATCCT

TGCTTCATGAGCTGTTTCTTAAAGAAAGCTGGATTTTTTGACAGCCAGGGTAAATTTGACGTAGA  
CAGCACCATGGCTTTTCGCCAAGGACCATGTGAGCAGTGAACCGGCTATGAAGTTCGTTGAAGCTG  
TCGGAGATGAATGTGTTAAAATTAATGATGAAGATGTCAGTGTGGAGACAAAGGATGCGATAGA  
GCTAAACTGCTGTTTGAAGTGTATAGGTGAGACTAAGAAAAAGATGGAGTGA

>SfruOBP6

ATGTCTAAGTTCGCTTGTTTGGTGGTGTGTGTTGTGGCTGTGAGCCTGAGTGGGGTTCATGCAAC  
TGCCGAGGAGAAAGCAGCTTTCATAGAAGCTGTGAAGCCCCATATACAGGAGTGCTCAAAGGAGC  
ATGGAGTCACTCCTGAAGAAATTAATCTGCCAAGGCTGCAGGCAATGCAGATGGCATCAACTCT  
TGTTTCCTGAGCTGTGTTTATAAGAAAGCTGAAGTTATTAATGACAAAGGAGAATACGATGCCGA  
TAAAGCCCTGGAGAACTCAAGAAATTCGTGAGCAACGAAGATGATTATGCTAAATTCGCAGAAA  
TTGGAAAGAAATGCGCTTCAGTTAACGAGAAGTCAGTAAGCGACGGAGATGCTGGTTGCGAAAGA  
GCTGCACTGTTGACCACATGCTTTTTGGAACACAAGAGCGAGATCCCCGCTTAA

>SfruOBP7

ATGACACGACAACAGCTAAAAAATCTGGCAAACCTATGAAAAAATCCTGCATGCCGAAGAATGA  
TGTGACCGAAGACGAAGTAGGTGACATCGAAAAGGGGAAGTTTATAGAAAGTCGTAACGTTATGT  
GTTACATCGCATGTGTCTACACAATGACTCAAGTTGTGAAGAATAACAACTAAGCTACGAAGCT  
GTTATTAACAGGTGGATGTGATGTTTCCAGCTGAGATGAGGGATGCTGTCAAAGCAGCTGCTAC  
TCACTGTAAAGAAACAACCAAGAAATATAAGACTTGTGTGAATCATCATACTGGACCGCTAAAT  
GCATGTACGACTACGACGCAGAAAAATTTTGTATTTCTTGA

>SfruOBP8

ATGGCGCGGAGGCAGCGGGGCGCCATGTTACAGAGACGCTGCCCCCTCTTTGTCATTTTAGTTGC  
TGTTACTCATGGCGGTAAGGATAAGCCGGTGTTTAGTGACGAAATCAAAGAAATAATACAAACAG  
TTCACGACGAGTGTGTGCTGCTAAACTGGGGTCGCGGAGGAGGATATAACGAATTGCGAAAACGGC  
ATATTTAAGGAGGACGCGAAATTGAAGTGCTATATGTTTTGCCTGCTGGAGGAAGCGAGTCTCGT  
CGATGATGACGATACAGTGGATTACGACATGCTCGTCAGTCTGATACCTGACGAGTACTACGAGA  
GAACTACTAAAATGATATTCGCATGTAAACATCTCGATACTCCAGATAAAGACAGATGCCAGAGA  
GCGTTCGAAGTACACAAATGTTTCATATGAAAAGGATCCAGACTTATACTTCTTATTCTGA

>SfruOBP9

ATGGGTCAGTATAACAACAACACTACTACTCCACAACACAGTCCTCCAGGAGATATAAAAGGGAGCG  
ACGTCCGAGTAACTCGGGACAAAGGAGTCAGTACAACCCGAACAGCCACAAAATCTCAGGATATG  
AAGATAATTTCCGATCAGACGAGAGAAACAATACAGAAAATAATTCCAGCAAAGAAACAGACAAT  
AAGTCGTGTGCGTTACACTGTTTCTTGGAATTTGGAGATGACAGGGGAGGACGGCATGCCGGA  
CAGATATCTGGTGACTCATGCCATCACGAAAGATGTGAAGAATGAGGACCTGAGGGATTTCTCTCC  
AGGAGTCCATTGAAGAGTGCTTCCAGATTCTCGATAACGAAAATACCGAAGACAAATGCGAATTT  
TCGAAAAACTTGCTGATTTGTTTGTGTCAGAGAAGGGAAGGGCTAACTGTGACGATTGGAAGGATGA  
CTTAACGTTCTAG

>SfruOBP10

ATGACTAAAGTACTATTTGCCATCGTAGTGACGATGATTACATTTGCCGTAGCACTCTCCGCCAG  
TACTAAGGAAGCTCAGACCACCACCATGTCTGACCAGGTTAACAGCATCGAGGTAGATGTCTTAG  
CTGTTATGGACATGTGCAACGATAGCTACAGGATTGATCCAACCTATTTACAAGCACTAAATGAG  
AGTGGGAGCTTTATTGATGAACTGACAAAACGCCAAAGTGTTTCATCCGCTGTGTTTTCGAAAA  
CGTTGGCATAGTATCTGAGGATGGTAAGCAGTTCAATCCTGCGAGGGCAGCTGTCATCTTTGCTG  
GGGAACGGAATGGAAAGCCTATGGAAAGACATCGCAGACATGACTGCTCTGTGCGCCACTGATAGA  
CAGGAAACCTGCCCCCTGCGACAGATCATAACAAGTTCCTAAGATGCCTCATGTCAATGGAAATTGA

AAGATATGAGAAATCTTAG

>SfruOBP11

ATGTGCAAGTTCAGAGTGCTCTTGCTGGGCTTTGCAGTTGTGGCGGTATATTTTAGTCACGTTAA  
TTGCTTATATGACGAAGACAAGAAAATTCTACGTGATGGTTTGGAGTCTATAGCTCATGACTGTT  
TGCATGGATGTGGTATCGACGAAACAGAAATAGAAAATATTGAAGCCGACGATAATGTTGACCAG  
TGTTTTAAGAAATGCGTTATGACAGACGCTGGATTTGCATTATCAGATAGAGAAAAGTCAACTAT  
TCAAAAAGAGTTAACAACAGTTGGTCTACAATGTATACAGCAACATCCTCTATCTTTGTCTGATA  
TTAGGTCGTTTAGGAACAAAATGATCCCTGATGGTAAGAAAACCAAAGTGTTTCGTGGCCTGCCTG  
TTCAAGAAAATTGGAGTGATGGATGACATGGGAATGATATCACCAATGAAGGCAGAGGAGAATGC  
TAAAAAGGTCTTCAAAGACAACGAGGAGCATATTAAACATGTCAATGAGATTATGGAGAAATGTT  
CTTCAGTGAATCATCAGAACACGAGTGACGGAACAAAGGATGTGACAGAGCGAAGTTGGCTTTC  
AATTGTTTCACAGAAAATGCTGACAGATATGGATTCGATTTTGACTTTTGA

>SfruOBP12

ATGGGATCGTGCAACGTCTTTGTGCGGCTCGTGGTGTAAACAGTGGGTGTGAGAGAGATAGAACC  
ATCCAAGGATGCTATGAAGTACATCACCTCAGGATTCGTGAAAGTTCTGGAAGAATGCAAGCAGG  
AGCTAAACATGAACGATCACATCATAGCAGACCTGTTCCACTACTGGAAGCTGGAGTACACGCTG  
TTGAACCGCGACACCGGCTGCGCCATCATCTGCATGAGCAAGAAGCTGGAGCTGCTGGACGCCAA  
CGGGAGGATGCACCACGGCAATGCGCAGGAGTTCGCCAAGAAACACGGCGCTGGTGACGAAGTAG  
CTTCGAAGATAGTGCAAATAATCCACGAATGTGAAAAGAAGCACGAGCGTGATGATGACGAGTGT  
CTCCGGGTGCTGGAGGTGGCCAAGTGCTTCCGCACCGGCATCCACGAGCTGGACTGGCAGCCCAA  
GGTCGAGGTCATTGTGGAGGAGGTCCTCACGGAATGTAG

>SfruOBP13

ATGCTTGGTATGAAGACAATCGTAGTGCTCTGTCTGATTGTGTACGAAGCGGGGCTGGTGCACGG  
CGAGCACGAGGTGAGCGTGCTGCGCGCCCTCAGCACCAGCATCGGAGACACGCTGCTGGAGTGCC  
AGACCGAGCTAGATATCAAGAATGAAGTAATTCAAAGCTTTCTGAACTTCTGGGACCTAAAGAAC  
CCCGCGGACACCAAGGAATGGGGCTGTGCTCTTGACTGCGTCTTTCAAAGAATGCGTTTTTTGAC  
TCCAGATGGCAAAACCGTGATATCGGCAAACGTGCGAGAATTCTGTAAGGCAGCAGGAGCCGATG  
AACTAATGTGCGGTGCGGATGGTAGACCTGTTTGAAATGTGCAAGGACGGTGCGAAAAAGATCATA  
AGTAAATGTGACAACGCCCTGGAGGTGACCAAGTGTTTCCGCCACGGCATAGTCCAGCTAGATTG  
GGCCCCGGAGCACAATTTCTGGAACCGCACTCGGGAGCACCTTGACAACATCCCGGTGCAAAGGA  
CAGACATAGTTAAGATTCTTTGCCGCAGAGACATTCATCATTGAATGTGTGGCGGAGACGATTC  
GGTTACAGACGGCTCGCCTCTATCTTAAGAAGATCTTTTTGTTGA

>SfruOBP14

ATGATGAGAAAAACGTGCCAACCAAAGAATAATGTGCAAGACGAGAAAATCGATCCGATTGCCGA  
CGGTGTCTTCATTGACGAGAAAAGTAAAATGCTACATGGCTTGTATTATGAAAATGGCTAACA  
CGATCAAAAATGGGAAATTAAATTATGATGCAGCCATAAAACAGGCTGATTTGTTACTTCCTGAT  
GATATAAAGGAACCTGCTAAGGAAGCTATTACTGCTTGCAGAAAAGTTGGCATGGACTGTAACAT  
TGAACACCCCTATAACACCAAAAAGAAATGCTGGAACATAAAGGATAACAAAATACCTGATACAAACA  
ACGCTAAATGTTTCGTTGCCTGCGTTTTCAAGAAAACGGTATGCTGGACAGCAAAGGCATGTAT  
GATGCAGAAAACCTCAATAGCAATGACACAAAAGATTTTCGCTAATGACCCGAAGAGATTAGAAGG  
TTCCAAGAACTTTTGAAACTTGCAAGAAAGTGAATGACGAAGCCGTATCTGATGGTGAAAAGG  
GATGTGAAAGATCAGTCTATTACATAAATGTTTTGTTGAAACCGCGCCTCAG

>SfruOBP15

ATGCTGCTGTTGCTGCGCGCGCTGCCGCTGCTGGCCGCCGTGCTGCCGCTGCGCGCCGACGTCAA

CGTCATGAAGGACGTCACTCTCGGCTTCGGACAGGCGCTCGACAAGTGTGCCAGGAGAGTCAAC  
TGACGGAGGAGAAGATGGAAGAATTCTTCCACTTCTGGCGTGATGACTTCAAGTTCGAGCACCGC  
GAGCTGGGCTGCGCCATCCAGTGCATGAGCCGGCACTTCAACCTGCTCACCGACTCCAGCCGCAT  
GCACCACGAGAACACCGAGCAGTTCATCCAGTCCTTCCCCAACGGCGAGGTGCTGGCGCGGCACA  
TGGTGGAGCTGATCCACGCGTGCGAGAAGCAGCACGACCACGAGGAGGACCACTGCTGGCGCATC  
CTGCACGTGGCGGAGTGCTTCAAGCAGGCGTGCGTGACGCGGCGTTCGCGCCCTCCATGGAGAT  
GATGATGACCGAGTTCATCATGGAGGCGGAGGCGCGCTGA

>SfruOBP16

ATGGAAAAATACTCATCTTCACGACTTTCCTATCGCTTGCTGTTGTAGTGAACAGCTTCAAAAC  
AAAGTTTTTCTCGCAAAGCTTGGACTCGGAACCTCCGGTCTCGATCCTGTACGCGCGTGACAAGA  
AAAGTGATAAAGTAACAGATGATTGCTTAACAGAAATGTACCCACGGAACCTTGATAAGTATCCT  
CTGCGTATCGATAGGAATGATATACCCTGTATAATACATTGTGTGCTCAAAAAATTCGGTATAAT  
GACGAACGATGGTTACATAAAACATAAAGAATTACTACAGGAGAGTGCAGGCTATACACAGGTATG  
ATCCGAGGATCTTGATATCGGATGTGCGAGAAACCTGTGCTCAGAACATCAACGGAATGAATCTG  
GACCACGATGTGTGTAAGAAAGCGAAGGTCTTTAACGATTGCACGCAACTGTACGCAGTGTCTTA  
CAAAGACCCCGACGAATGGAAATAG

>SfruOBP17

ATGGCTCAGCATTGTAATAATGCATCTCACGCAGATGTTGTGCAGACTCCTACTAAAAAGAGAAAC  
TAGAGCTTCTCTGAAACCACTATCAGTATGCTGCGATATCCCAGAGTTGGCTGATGAGAGGCAGT  
TATCGAAATGTTCCCCAAAACCTCCTGGCCCGTGTGAAGATGTCCAATGCATCTTTGAAGCATCA  
GGCTTCTTGACAGACAAGAATACCTTGAATAAGGCTGCATACAGAAGCCATTTGCAGAAATGGGA  
GAAGAGCAATCCGGGCTGGACTGATGCCATTTATAAAGCCATTACTGATTGTGTGACAATGACC  
CAAGGCAGCATCTTGATGTAGCTTGCAAAGCCTATGATGTGTTTACTTGCACTGGTATCGCTATG  
TTAAAGAAATGTCCTGAAACAGCGTGGAAGTGTTAG

>SfruOBP18

ATGTTTAAGTTCTGTGTCTTCCTTGCTTTGGGGTTCGTGGCATGCCACGGGGCTCCAAATACTAA  
CCCTGGAACCTTACTGTGGCGCTACACCAGATAACATGTTTCAAGTGCCTGAACAATCCTCGCGTGG  
TGACTCCTGAAGTGCCGCCAAATGTGGCAGTCAAGTCACAGAGTGTGAGAGAATGACCTGCATC  
TTCCGTGAATTGAAATGGTCGAAAAAAGGAGCAATAGACAAGGCGAAGGTGAGGGCCTACTTCGA  
GCAGTACGAGACGGAGCACCTGACTGGGCCCAGGCTGTCCAGCATGTGAAGTCCTTCTGCCTGG  
TCCCTGAACTTCGGGCCCAGGAGTGTTTCTCAACTGCCCCGTTACGACATCATGCAGTGTATC  
CTGTCTAGCTTTATCAAGCACGCCAGCCCGTCCGTGTGGTCGAACGCGACAGACTGTGATTACCC  
CAAGGCGTTTCGCCGTGCCTGCCCCGTCTGCCATCTGACTGCTACTCACCCAGATCCCATTCTG  
GCTCCTGCAACGCCTGCTACTCACAACCACGTACAGTCTAA

>SfruOBP19

ATGATAACATCATCCAGTTTATTAGTACTAGCTGCTGTTGTTTCAAGTGCTATTTCGCTCAAGAGCC  
TGCCCTTCGAGTCTGGACCTCCAGAGCCATGGGGCCCTCCTGAGAAACAGACACCACCCGCCTTG  
CACCAAGAATACCAAGAACTGTTGGGCCCCCTCCACAACGGATAAATGTGTACAAATGCTGCCCC  
ATACCTTCACTGTATCCAGATGAAGCCATGCAGAGCTGTGGTTTTGAAAACTGCCCGAGGGTGA  
GGCACCGAAAAAGCTGTCTATCGTCCCGAGGGTACATGCAAGGAAGGATATTGTGTAATGGAAA  
AGTTCAATCTACTTTTGGCAAACAAAAGCGTAGATTACGAAAAATTCGGAAACTATTTAGATAGT  
TGGGCGGAGGCGAACCCGGAGTTTGCTAAACCTATTAACTAGCTAAGGAAGAATGTGCCAAAGA  
TGAGGGACCCAAAGGCCCTCCAATCTGCGACCCTGACAGGATATTCTTGTGTCTGACCTCAATAA  
TATTTTGAATTGCGATCTTCGTGATGGAGAAGGTTGCAGTGCATTGCAAGAACACATGAATGAA

TGCCGACAGTACTATACACGC

>SfruOBP20

ATGTTTCGCCGAGCGCTGCTGTTTCTCTCTGTTATTTATTCATTGCAGTATTGCAATGGACAGAC  
AGAAGCTCCCAGAGAAGAACCGTATGATGGGGATTGACGCTGTTACGACAACAACGTGAAAATCG  
ACAAAGATACTATAATTACACGTAATTTGAAATTGGAGAAACGGAACCGCGGACCGAAGTCGGAT  
TCTAATAAAAATGTGGATGAAAAAGAGCCAGACTGGTCTTATGCGAGTTTCCCTAAAGAAATTTT  
GGAACACGTTGAGAACTTTAAAAAGAACATGAGCGAGTGTTTGAAGGAAGTGCAGTCTAGTGACA  
AGAGGCCGTGTCAAGCGTCTCTCTCCTAAAATGGAGTCTCCTGTTTCATGGCGAATGTCTCATTGCC  
TGTGTTCTGAAACGCAACGGTGTTATTATTCATGGAAAAGTTAATAAAGATAACTTAATAGCTCT  
TGTAAGTAAGTTCTACTCTAAAGACACCAGGCTCATGAAGAAATTGGAGAAGAATTTGGATCGTT  
GTATCGAAATGAGTGTGCGTGCCCAAGACGACTGCACGTTGGCATCGCTGCTTAACGATTGCACT  
AACGACCTAATGGCCAGCAATAAACACAAATTAACGGTTAATTATTAA

>SfruOBP21

ATGTTCAAGTTATCGGTATTTGTGTGTTGTTTGTACTTCTGTGCTTTAACACCTTATTTAGTTTC  
TGCCATGACAGCTGAACAGAAGGCTATAATCCATGAACACTTCGAGACCATCGGCAAGGCTTGTA  
ACAAAGACAGCACTGTGATAACAGCAGATGATGTGCTCAATCTGCGAGCTAGGAAGATGCCGAGC  
GGACCCAATGCGCCTTGCTTCCTGGCTTGCGATGATGAAGCAAATTGGCATTATGGATGATAACGG  
TATGGTGCAGAAAGAGAATGTGCTTGAAATGGCCAAAGCTGTATTGACGATCCCGAAGAAGTGA  
AGGCAATCGAAGACTACCTACACTCCTGCTCACAAGTTAACACTGAGTCGGTCAGTGATGGTGCT  
GCCGGCTGTGAGCGTGCTATGCTGGCGTACAAATGCATGATAGAGAATGCTTCCAAGTTTGGCTT  
CGATATTTAA

>SfruOBP22

ATGACTTGCTCCCAGGCGCTGGCGCTGCTCGCGCTCGTTGCCATCTCGCAACAGGCAACAACAGG  
ATGCAAAAATTGTATAATGCTGGGTAAAGGAGGAGAAGGCGATGTTCCGCGCGCACTCGGACGCGT  
GCGTGGCGGCGCTCGCGCGTGGAGCCGCGCCTCGTGACGCCATGCTGGCGGGCGAGCTGCTGGAC  
GAGCCGGCGCTGCGCAGGCACGTCTACTGCGTGCTGCTCAAGTGCAAGCTCATCAGCAAGGACGG  
CAAGCTGCAGAAGGCCGCCGTGCTCGGCAAGATGGCGGCACGACCTGACGCCAAAACGCTACCA  
AGGTTCTAGAGAGCTGTGCAGACCAGACGGGCGACACTCCTGAAGACCTGGCGTGGAACCTGTTT  
CGCTGTGGCTACGACAAGAAGGCGCTGCTGTTGCACTACATGCCCACTAACGTCGCCAGCGAGAC  
TGACAACAACCTCCTAA

>SfruOBP23

ATGATTTTAAGTGTTTGTACGGTGCTGTTGATATTAAAAAATACTTCAAAGTATGCGACAGAAA  
TGCTATAGACGTCAACGACTGCATGGCGGAGGCTGTGCGACAAGGCATTGCAACTATGATCAATG  
GGATAGACGAGCTGGGAGTGCCACCGATCGATCCTTACTTACAGAAGGAATTCGCGATGGAGTAT  
AAGAATAATCAGATCGCAGCGAAAATTGAATTTAAAGAACATTTACGTGGAAGGTTTGAAGGAGGC  
CATTTGTTTCATGACGCCAGATTACGCGCTGATGATGACAAATTCATTTAGAAGTGGACCTGAGTG  
GACCAAGAGTTTTCAGTCAAAGCCGATTATTATGGAGAAGGGCAGTTCAACTCTTTGAAGATTGTA  
GCCTACGGACAAGTTAATACTACGATGACTGACTTGGTGTACACGTGGAACTCGACGGAGTTCC  
GGAGAAGAATGGCACTGAGACGTATATACGTATCACAGATTTCTACATGAGACCCGACCTTGGA  
GCATTGTCACACTCTTCAAAAACGACAATCCTGAATCTAGAGAATTAAGTGAAGTTGGGTACAAGA  
TTTCGCCAACGAAAACCTGGAGAACGCTTTACAAGGAATTCCTGCCTTATGCTCAAGCTAACTGGAA  
GAGAATCGGCGTCAGAGTAGCCAATAAGTTGTTCTTAAAAGTTTCCTTACGATCAACTGTTTCCCA  
CATCTTCATGA

>SfruOBP24

GAGTCAAGATGCCGCAACCCACCTACAGCGCCACAGAAGATAGAGCGAGTGATCACTCTGTGTCA  
GGATGAAATAAACTGTGCTACTCAGAGAGGCTTTGGACGTGATCAAAGAAGAACACACGATGC  
CTGCACAGAGACGGCGTGACAAAAGAGAGGTGCCTTTACGCGACGATGAGAAGAGAATTGCTGGG  
TGTCTGCTGCAGTGTGTGTACCGGAAAGTGAAAGCTGTGGACGGCTACGGTTTCCCGACCCTGGA  
AGGTCTGGTGGGCCTGTACTCCGACGGTGTGAACGAGCGCGGCTACTTCATGGCGGTCCTGGAAG  
CCTCGCGAGAGTGCCTCATGAAGAACCACGACAAATTCTCCAGGACTGTTCTATGGACAACGGC  
CGCAACTGCGATGTCTCTCTTCGACATATTCGAGTGTATCTCGGACCGTATCGGCGAATACTGCGG  
AACCTCCGGCCTCTAA

>SfruOBP25

ATGGCTAAAGTTACTTGCATACTCCTCTTCGTAGTAGCTGTGAGCTTAAGTAGTGTTCAAACAGA  
TGAAAGCCAAAACAGCTCTGAGGTTGATGCAGATGTGGATAAGGTCATAGACGAATGCGCTAAGG  
AGTTTCATGTACCACATCAACTGCTCATGGCAGCTGTGACGACGGGCAGTGTTTCATGCACTCACC  
CCATGTTTTTGGAGTTGCTGTTTCAAGGGAGTTGGAGTCTGAATAGTGAAGGTCAATACGACAT  
CGATGCTACATTGGACTTGTCCAAGAAAATGTTTAGTGGTTCGGAATACCAAAAAGTTGAAGGAA  
TCGTAAAATCTTGTGGATCAGTGAACGATATATCAGTAAGCGATGGAAAAGCTGGATGTGAAATT  
AGTGTTCCTACTAGCAGTTTGCATACTTGATAATTGCAAGAAAATATTCCCAAACATGTTTCATGA  
TTAG

>SfruOBP26

GGGTGCGAAAGAGCTGTGCTGGGAGCCATCTGCTACATGGAACATAAACTGTTTCAGGCAGCTGT  
TTCTGAAGAAGAGAAGGAAGCCTTCCGTGAGGCGATGGCTCCCATCATTGCGGAGTGTTCCGAGG  
AACATGGAGTCAGTGAGGCTGACATCAAAGCTGCGAAGGAGGCAGCCAGTGCTGATGGCATCAAA  
CCCTGCTTCTTAGGCTGTGTGATGAAGAAAATTGAAGTGCTGGACTCCAAGGGCTTGTACGACGC  
AGAGACTGGACTTGGTAACTGAAAAAGTTTCGTCAAGGATGAAGCTGACTTCGCTAAATTCGAAG  
AAATCGCCAAGAAATGCCTTAAAGTTAATGAGGAATCTGTAAGCGACGGTGAAGAGGGTTGTGAA  
AGAGCCAAGCTTATTCTGGGTTGCTTCATCGACCACAAAGTTGAAATGCCGTTT

>SfruOBP27

ATGAAGTATAAAACAAGACGCACGCGAAACGAACGCGAGCAAGAAAAAATGCATAAACTACAGAA  
CATATTTGCATTAATCTTGTTTCATACTATTCTCTTTTCGCGTTCTATTTAACTATATCCTTCACGC  
CACTTACAAAGGAAGAGCAAATGGAACGCTACAACAAGATGACGGAGAATGTAGAACCATTTCAGG  
AAGAACTTGACTGAATGTGCGCGACAGGTCAAAGCTTCAATGGCAGACGTCGAGAACTTCATAAA  
ACGGATCCCTCAGGCCTCCTTGCAAGGGAAATGCTTCGTCGCCTGCATTCTCAAACGTAACCTCTA  
TCATAAAGAACAATAAAATAAGCAAAGAACATTTATTAGAAGCCAATAAAGCTGTTTACGGGGAA  
GATAGTGAAGTGATGGCTCGTTTAAAGACTGCGGTAGGTGAGTGACGCGAGGTAGTCGAAGGGAT  
ATTTGAAGTTTGTGAATATGCGTCGGTTTTCAACGATTGTATGCATATCAAAATGGAGCATATTC  
TTGATAAGGTGACGATGGAGCGGCGTATGGAAGCGATAGGCAAGATGACGTCGAACCCTGACCAA  
TGGAACGAAGAAGAAGATGAACTCTTGAAGTTGGTTAAAGATGAATTATAG

>SfruOBP28

ATGGTAGGTGCCGTGGCGCTCCTCGCGCTCCTACCGGCTTTGGTCGCGGGTGCTGGTGAAGGCAA  
CATCAAATTACTAGAAGATGAAGTAGCAGTAGCTTTGAAATCATGCACGTATCCTGACGACATCA  
CTAACTCCAAAGAACC GGCGAGCAAGGAACGTCAACGTGATCTGAGGACTCTTATGATGCTTCT  
CCCAGAATAGACGACAATGTGAAAGAAGGGAATCGGTACAGCCACGAGAGACGAATCAGCAACGA  
CAGTGGCGACCAACTAATGGTCATCAACGCAACTGATGACGATTACAGTGGCTACGGATCTGGAA  
ATATGGGGGAGAACTGCTGACATCAGTACCACGCCCCGCGTCTCCGAATAACAACATAAACAAG  
AATAATACCAGTAGAACCAGACGAAACGAACCGCTTCTAAACCGCCAGATTTCGGATCAGTGTCT

CAGTCAATGTGTGTTTCGCCAATTTACAAGTGGTGGACAGCAGAGGAATACCACGAGAAGCAGAAT  
TATGGAACAAAGTGCAATCTGCTGTGACGTCACAACAATCCCGGTCTGCACTGCACGATCAGATA  
CGAGCTTGTTCCTCAGGAGTTGCAATCAGAGGCTGAAGACAATGGTTGCTCTTACTCCAATAAGTT  
GGAGCGATGCCTGATGCTACGTTTCGCCGACCGCAAGGTTGACGGTAAAGGAAATGCTAAGAAAT  
CTTCTAAGGAACAAACATGA

>SfruOBP29

ATGTGGAATTCATTATTTTTTCTGTTCACCTTTGGTGTTCCTTTAAATGCTGAGGCTTTAAC  
TATGGATGATCTGAAACAGAAATACGTGGACAACATACTAGAATGTAGCAAGCAATACCCCGTAG  
ACCGCGCTGATGCAGAACAGCTACAGAACAGAATTATGCCTGATAAAGAATCTGTCAGATGTTTG  
TTTGCCTGTGTTTACAAATTGGCGGGAATGATGAACGACCAGGGAGAGCTCTCAGTTGAAGGTGT  
CAATGCAATATCTCGAAAGTATTTGGCGGAAGATCCAGAAAAGTTAAAGAAGAGTGAACAGTTTA  
CCGAAGCTTGCCGAAGTGTAACGACGCTCCAGTGAACGATGGAACAAGAGGCTGTGATAGGGCA  
GCTTTAATATTCCAGTGTACCATAGACAAATCACCTGATGGTCTCACGGAAGAAGAGCTCAAGAT  
GGAGTTCACGAAGTTGGTGATGAAGTGTAAACAAGGATGGACAGATGGACATGACAGAACTGGTGC  
AGTTGCAGAACTACGTGGTCCCGACGAAGCAGTCGGCCAAATGTGTGTTAGCGTGCGCTTACAAG  
GCCGCAGAAAGTGATGAATGCTAAAGGTGAATACGACATTGACCACGCGTACAAAGTAGCTGAAAT  
GATGAAGAATGGAGATGAGAAACGGCTGGTAAATGCAAAGAAAATGGCAGATCTTTGTGTGAAAG  
TAAACGAAAACAGTGTCTCTGATGGCGAAAAAGGTTGTGACCGAGCCGCTATGATATTCAAATGC  
ACTGTTGAGAATGCACCCAAGTTTGGATTCAAGTTATAA

>SfruOBP30

ATGGTCGACAAAATCCTGATTTTTTACATTTATAACACTCTCCGGCTTCGCTCACGCTCGCATGTC  
AGTGATGTATGCCCACGATAAGCTAAGTGACATAGTTGCGCAGCAGTGTCTTTCAGAAATGTACC  
CTAAGAACAGGCGCATTGAGATCCAGGAGTCGGACGAACCTGCATCATCTTCTGCGTCCCTCAA  
AAGTTTGGCATCATCAGTGCCACTGGTGTGATCAATCTGGAGGTTTATAGAAAACGAGTCCTAAT  
CGCTCACCGAGCTAGACCAAAACACCTCAGTCATGGACAACGGGGGCTCCTGCATGGAGAACGCAG  
AAGCAACTCAACATAAACAAGACGTCTGCAAGAAAGCCAAGGTCTTCAACGACTGCACACATTTA  
TACAGAATACTACTTATGTAA

>SfruOBP31

ATGTGGACGCAGGCGCTAGTGCTGACGCTGGGCGCGCTGGCCTCGCTGGCGGCGGCGGCCGTGGA  
GATGGACGAGGACATGGCGGAGCTGGCGCGCATGGTGCGGACAACCTGCGCCGGGGAGACCGGCG  
TGGACGTGGCGCTGGTCGAGCAGGTCAACGCCGGCGCCGACCTCATGCCGACGAGAAGCTCAAG  
TGCTACATCAAGTGACGATGGAGACGGCCGGCATGATGGCGGACGGCGAGGTGGACATCGAGGC  
CGTGCTGGCGCTGCTGCCGCCGTGCTGGCGGACCAGCACGCGCCGTGCTGCGCGCTGCGGCA  
CCCAGCGCGGCGCCGACCACTGCGACACCGCCTTCCGCACGCAGCAGTGCTGGCAGAAGGCTAAC  
AAGGCCGACTACTTCCTCATATAA

>SfruOBP32

ATGAAGACTCTGTTGGTTTTTCGCTGCCTGCATTCTGCTTGCTCATGCTCTGACTGATGAGCAGAA  
AGAGAAACTCAAGAAACACCGCTCCGAATGTCTGACTGAGACCAACGTTGATGAGCAGTTGGTCA  
ATAAGCTCAAGGGTGGTGATTACAAGACGGAGAGTGAGCCCCTGAAGAAGTATGCTCTCTGCATG  
ATGATGAAGTCAGAGCTGATGACCAAGGACGGCAAGTTCAAGAAGGACGTCGCTCTGGCCAAGGT  
TCCTAACCCAGCTGACAAACCGACCGTGGAGAAGCTTATTGACGCCTGCCTGGCCAACAAAGGCA  
ACACTCCTCATCAGACAGCCTGGAACACGTCAAGTGTTACCATGAAAAAGACCCTAAGCATGCG  
ATTTTTTTGTAA

>SfruOBP33

ATGTTCAAGTCAGGTGTTGTGTATTGTATTGTTGTTGCTGTGTTCTTCAAGAATGCTTTGGCCAT  
 AACTGATGAGTTAAAATCTCATATAGAAGCAAAGTTCTTAACAGTTGGTGCAGAATGTATAAAAG  
 AGCATCCCCTAACAATTGAAGATCTGTCTGCTTTTAAAAACAGAGTTTTCCCCGAAGGTGAAAAT  
 GCTGGATGCTTCTCCGCTTGTATTTTCAACAACTGGGATTGTTTGACGACAAGGGTCTTTTATC  
 CCACTTAACAGCTCTGGAAAACGCCAAGAAAGTATTTGAAGATCAAGGAGAATTAGAAAATATTG  
 AGAAATTCCTCACCCTTGTGCTAAAGTCAACGACGAGGAAGTATCTGATGGGGAAAAAGGCTGC  
 GAAAGAGCAAAATTGGCATACTGCTTCATCGAAAATTATGAACAACCTCGGATTTGATCTGGA  
 GTTCTAA

---

**Nucleic acid sequences of SfruCSPs**

---

>SfruCSP1

ATGGTACGTCTTAAAGTTAAGATAGGAATACTTCCAGAGGCGTTGAGGACGAAATGTGTCCGCTG  
 CACAGAGCGACAGAAGAGAACAGCAGTGAAGGTGATCAAGAGGTTGAAGAACGAGTATCCTGACG  
 AGTGGTCCAAGCTTGCTTCCCGGTGGGACCCCACTGGAGACTTCACCAGATACTTCGAAGAGTTC  
 CTCGCTAAGGAACACTATAATACTATTCCAGGATCAGGCAGTGCGCTCCCTACATCGTCTCCGTT  
 AGCACCACCTCGCGTGCCACAATCAGTACCAGCCACCACCCGACTCCAGGTCCACGGAGTCCA  
 CCCC GCCGAGACCAATCGTACTGAACAGATTTGGTGGCGACGGCGAGCTAATGATGGGCAGTCCC  
 TCGTCCGCGGGCGTTACTCCAAGGCCGATGACCCAGGCCACCACGAGGCCCAGCACCACCACGAA  
 GCCTAGTACCACCACGAAGTCGCC TAGCACTAGGCCTGTACCACCAGACCAACAATGATGACAT  
 GGGCTGGTGCAGCTTCAAACACGCAGTCGACGCGTTTCCCACTGCGGCCAGTATCAGAAATGTCC  
 CCACCATACTCCACGGCCATAACCTTCATCGACCAAATCGGTTACAAAATAATAAGGACAACAGA  
 ACTTGTCACCGACATAGTCAGGAACACAGTGAGAGCTGTGCTTGGTCGGTAG

>SfruCSP2

ATGCAGATCATCTTAGTTTTAATCGTGGCGTGTGTGGGTTTGGCAGCCGGCTTGATGTGCAGGC  
 TGGGCCACAAATGACAGACGCACAATTAGAACAGACTTTAGCCGATAAGAGCACGATGCAGCGAC  
 ACATTAAATGCGCACTCGGTGAGGGACCTTGCGATCCTGTTGGGAGACGCTTACGAACCTTAGCT  
 CCGTTGGTACTACGAGGGGCTTGTCCACAATGCTCGATGCAGGAGACGCGCCAGATTGACGAC  
 CCTTGCCTTTGTGCAACGCAACTACCCATGGGAGTGGGCGAAAATTGTTCCCAATATGGTTAA

>SfruCSP3

ATGAAGTCCATGCTTGTGCTCTGCGTGTGTCTGTGGCGGCGCTGGTGGTGGCGCGCCCCGAGGA  
 CCACTACACCGACCGCTACGACAACGTGAACCTGGACGAGATCCTCTCCAACCGTCGCCTGCTGG  
 TGCCCTACGTCAAGTGCACCCTGGACCAGGGCAAGTGCGCCCCCGACGCCAAGGAACCTCAAGGAA  
 CACATCAGGGAAGCTCTGGAGAACGAGTGTGGCAAATGTACCGAGACCCAGAAGAAGGGAACCCG  
 GCGTGTGATCGAGTACCTGATCAACAACGAGGAGGCGTACTGGAACGAGCTGACGGCCAAGTACG  
 ACCCTGAGAGGAAGTACACCGTCAAGTACGAGAGTGAACCTGAAGAAGATCAAGGCTTAA

>SfruCSP4

ATGAAGTGCATCTACGTGTTGTCTGCTCTGCTGGTCTTTGCTGCTGTCCAGGCTGAGGACAAGTA  
 CAGCACGGAGAATGATGACCTGGACATCGATGCAGTGGTGGCTGACGTGGATGCTCTCAGGGGAT  
 TTGTAGGATGCTTCATGGACTCTGTGACCTGCCACGCTGTTGCTGCTGATTTCAAAAAGGATCTC  
 CCCGAGGCGGTGGCGACGAGCTGCTCTAAATGTACAGAAGCCCAGAAGCATATCTTCCACAGGTT  
 CCTTCTTGACTGAAACAGAAGCTGCCTGCTGACTACGAAGCCTTCAAGAAGAAGTTGACCCCTG  
 AGGGTCAACACTTCCACGCTCTCGAGGCCAATGTCTCCAACCTCTTAA

>SfruCSP5

ATGAACGGTGCAATAAATACAACCTTGGCTTATTGTTAATCTTTATGTGTTTATTTATTGCAAC

TGTTGTTTCTCAAGAGAAATTCTATGATAGAAGATACGATTATTACGAAATAGATACTTTGATAC  
AGAATCCTAGATTATTGAAGAAGTATTTGGATTGTTTTCTCTGGAGGGGACCCTGTACGCCTATA  
GGCAGAGTGTTTAGACAAATCCTGCCCCAAGCAGTTCAGACGGCGTGTAAGAAGTGCACCCAATC  
ACAGCGGAGACTTGCAAGAAAAACATTCGACGCCTTCAAGGGATACTTCCCAGAGATACATGAGG  
AACTGAGGAAGAGACTTGACCCCAAAAACAAGTACTATGAAGCCTTTGAGAAGGCTATATCGAGC  
GCTTGA

>SfruCSP6

ATGAAGGTACTAGTAGTGTGTCCGTATTCTGGCACTTGCAGCTGCAGCGCCACCCAAACCCAT  
CACGAAGGAAGAGTTGGCTATACTGGAGGCCCTTCGACTACGACGCCGTATTTCGCTAATGAAGAGA  
GTAGGAACTAATATTTCGATTGCTTGCTAGACAAAGGAGACTGTGGCCCTTACAAAAAAGTTGTT  
GAGCTATCAAAGAAATCAATGTATGATGAGTGTGCACTATGTTCCCCAACCCAGATGGCGAAGTA  
TGACCGCGTACTAAACTATTGCACGATGACTATGAAACCTTCTACAATGAATTGATCAAGAAAG  
TAGCTTCCGAGAAGGAGTAA

>SfruCSP7

ATGAAATTCGTACTAGTATTGTGCCTGGTGGCCGCCGAGTCCTGGCTGATGATGACAAGTACAC  
CAGTAAATACGACAACATTGATCTGGACGAGATTCTCTCCAACAAGAGGCTCCTCACTGCCTACG  
TCAACTGCGTCATGGAGAGAGGAAAGTGCAGCCCTGAGGGCAAGGAAGTGAAGAACATCTAGTA  
GACGCCATTGAGACTGGCTGCAAGAAATGTACTGAAGCCCAAGAAAAGGGAGCATACAAGGTCAT  
TGAGCACCTGATCCAACACGAGCTGGACACTTGGCGTGAGCTGTGCGACAAGTACGACGCCTCTG  
GCAAGTGGAGGAAGACCTACGAAGACCGCGCCAAGGCCAACGGCATCGTCATCCCAGAATAA

>SfruCSP8

ATGAAGGTAGCACTACTCACACTCTGCTTCGCTCTTGGAGTTCTCGCTCAGGATATGTACGAGAA  
TGCCAACGACAACCTTCGACATCTCTGAGGTTCTGGGCAATGAGAGGCTTCTCAACTCTTATGCCA  
AGTGCCTGCTCAACAAGGGACCTTGTACTCCAGAAGTAAAGCAAGTTAAAGATAAAATTGCCGGAA  
GCCCTGGAAACCCGGTGTGCTAAATGTACAGACAAACAAAAGCAAATGGGTAAGACTTTGGCTCA  
AGAAGTTAAGAAAAACCACCCCGACATCTGGAAGCAACTGGTAGAGATGTACGACCCTGAAGGCA  
AATACCAACAAGCATGGAAGGACTTCCTCCAAGAATAA

>SfruCSP9

ATGAATTCCTCGTGTTGTGCGATTGTGGTTACGATGGCGGCCTTCGTAGCTGCTGAAACTTACAC  
GGACAGATACGACCACATCAACATTGACGAGATCATTGAGAACAGGAACTGCTGGTGCCTTACA  
TCAAGTGCACCCTGGACCAGGGGAGATGTACTCCTGAAGGCAGGGAAGTGAAGCTCACATCAAG  
GACGCTATGCAGACCTCCTGCTCGAAATGTACCGAGAAACAAAAGAAGGGTGCCAGGAAGGTCGT  
CAGACACATCAGGGCTAAGGAGCAGGATTACTGGAAGCAAAATCCTTGCCAAATACGACCCCTGAAG  
ACCAATACAAGGAGAACTACGAATCCTTCCTCGCCGCTGAGGACTAA

>SfruCSP10

ATGGGTCCACAACCATCTAAACCCGGCATTGCGACAGTAGACGCCGCAAGAGGAGCACTTGCACA  
ACTTTCTTTTCGGTAAGTATTTTTCTATAAAAAGCTTCTTAGAAAGTGCTGTGAAAGTATTCATAA  
ACATGAGGAGCTGGTTGCTATGTCTGTGTGTGCTGACGGTGGTGGTGTGCTACTCCCAAGCC  
AATCGCTACGAGAACTTCAACCCTGATGCCATCGTGCAAAATGACAGGATCCTGTTAGCTTACTA  
CAAGTGCGTGATGGACAAAGGGCCCTGCACGAGAGATGGCAAGAACTTCAAACGTGTCTTGCCAG  
AGACGCTAGCCACCGCATGCGGACGCTGCAACCCTAAACAGAAGACGATCGTGCGCAAGCTTCTA  
CTGGGCATCAGGTCCAAGAGCGAACCCCGTTTCCTGGAAGTCTAGACAAGTACAACCCTGACCG  
CTCCAACAGAGATGCTCTATACGCCTTCCTTGTCACCGGTGCTTAA

>SfruCSP11

ATGAGGGTCCTGGTTGCTTTGTCGTGCTTGGTCGTGGTGGCGTTGGCTGCTGATAAAATACAACGC  
TAAATATGATAACTTTTGATGTGGATACCCTGATCTCTAACGACAGACTGCTGAAGGCATACATCA  
ACTGTTTCTTGGATAAGGGACGGTGCACGCCCCGAAGGATCAGATTTCAAAAAGGCCCTCCCTGAG  
GCGATAGAGACAACTTGCGCCAAGTGCACAGAAAAGCAGAAGGGTAACATCAGGAAGGTGATCAA  
GGCCATCCAGCAGAAACACCCCCAAGGAGTGGGAAGACCTCGTTAAGAAGAACGACCCCAAGTGAGA  
AGCACCGCGCTAACTTCGACAAAATTCCTTCAGGGAAGCAGCTAA

>SfruCSP12

ATGAAACTGGTAATCATTTTGGCATTGGTGGCGGTGGCTGTAGCCCGCCCTGATGACGGTGGCAC  
CTATGACTCGAAGTACGACAACTTCAATGTTGATGAGCTCGTTGGAAACGCACGGTTGTTGAAAT  
CGTACGCCCCTGTTTTCTTGTGATGACGGCAAGTGCCTCCCGAAGGAAACGATTTTAAGAAATGG  
ATCCCTGAAGCTACGACCACATCTTGTGGAAAGTGTTCAGAGAAGCAAAAGGCTCTCGTTGCAAA  
AACCATCCAAGCTATCAAGGACAACTTCCAGCAGAATATGAAGCTCTAATAAAGAAGCATGACC  
CTGAAAAATAACACCAAGGCAAACTCCAGGAGTTCCTTCAAAAATACTCTCATTA

>SfruCSP13

ATGAAGAGTATCCTAGTTTTGTGCTTGCTGGTCGCGGCCGTCTCCTGCAAACCAGAGACTTACGA  
CACTAGATATGACAACTTCGACGTTGAATCCCTGGTCGGCAATGTTTCGGCTGCTGACTGCGTACG  
GCCACTGCTTCCTTGGCAACGGACCCCTGTACTCCCGAGGGCAGTGACTTCAAAAAAACCATCCCC  
GATGCTCTGAGGACCGGTGTGGCAAGTGTCTCGCCGAAACAGCGTCACTTGATCCGTGTGGTTGT  
AGCAGGCTTCCAGAGCAAGACCCCAGACCTTTGGCAGCAGCTGGTCAAGAAGGAGGACCCCAACG  
GACAGTACAAAGAAATCTTCACCAGATTCTTGAACGCCAGAGACTAA

>SfruCSP14

ATGAAGGTCGTGTTTCTCGTGTGTGTGTTGGCTGCGGTGGTGTACGGTGAGCAGTATACGGACAA  
ATATGACAACATCGACCTGGACGAGATCCTTCATAACGAAAAAATCCTGCAATCTTATGTAAACT  
GCTGCCTGGACAGGGCAAGTGTACACCTGACGGCAAGGAATTGAAATCGCACATTAAGGAAGCT  
TTAGAAAACCGATGTGCAAAATGTACTGATGCTCAGAAGAGAGGTACAGAGAAGGTCTTGAAGTT  
CCTCATCAACAATAAGCCAGACATCTGGGACCAGCTCTGCAACAAATTCGACCCCGAAGGATTAT  
ACAGGAAGAAGTACGAACAGGAGTACCAATCCGCTAAACAATA

>SfruCSP15

ATGCAGTATATATTCCGTTATGGGCGAGATGAAGGCGTCACAGCCCAGCGAAGGGTGAACGGAG  
CTCACGGGAAATACGATACAAAATGAACTCATCATCGTACTCGCTTTATGTGTGGTGGGAGTCG  
CCTGGGCTAGGCCTGCCTCCACTTACACTGACAAGTGGGACAACATCAACGTAGACGAGATCTTA  
GAGTCCCAGCGTCTACTGAAAGGGTACGTAGACTGCTTGCTCGAAAGAGGACGTTGCACTCCTGA  
TGGCAAAGCCCTCAAAGAACTCTTCCTGACGCCTTAGAGCATGAGTGCAGCAAATGTACGGAAA  
AACAAAAGAAGAGTTCAGACAAGGTCATTAGGTTCTTGGTGAATAAACGCCCCGACTTATGGCAG  
GAGTTGTCAGGAAAGTACGACCCTGAGAATATCTACCAGGAGAGGTACAAGACTCAGCTCGAAGC  
TGCCAAGAAACATTAA

>SfruCSP16

ATGTATGGTATAAACTGGATGAATGGTGGCTTCAACCATCGATTCCACTGGGACATCGGATCAT  
ACACATTGATACAAAATTCAATATGAACGCGCTACTGATCGCTGTTTTTCGCCTTAGCCGCTCCTC  
TTGCTTATGGCTATGACGAGAAAATATGACAAAATAGACGTAGACAAGATTTTGGGGGATGATGCA  
CTATTCACCACCTACATTAATTGCATGCTGGACAAGGGACCCTGCTCGGTAGAACATTCTGCTGA  
CTTCAGACAACTGCTGCCCCAAGTGATAGCCACAGCGTGCGAGAAATGCAATGCCATACAGAGGC  
AAAATGTGAGGAAGACAGTCAAAGCCCTCAGTGAGAAGAAACCTGATGAGTTCGCCCCAATTCGGA  
GCCAAATTCGACCCTAAGGGCGAATACGAGAAGGCATTTCAGTGCTTTCGTGCTATTGGTACAGATTA

A

>SfruCSP17

ATGAAGGCTGACTGTGTGTTAATTATGACGTTGATGGCAGTGGTCGCAGCTGACTTCTACAACCTC  
CAAGTATGACAATTTTCGACGTGCAGCCCTTGTGGAAAACGATAGGATACTACTGAGCTACACCA  
AATGCTTTCTAGACCAAGGACCCTGTACGCCTGATGCCAAAGATTTTAAAAAATAATACCAGAG  
GCTCTAGAACTACGTGTGGTAAATGCAGTCCTAAGCAGAAGCAATTAATTAGGACAGTGATCAA  
GGCTGTGATAGCTAAACACCCTGAGGCTTGGGAACAACCTCAGTGACAAATATGATAAGGACAAAA  
AGTATAAAGACTCCTTCGACAAATTCTTAGCCGAACAAGAATAA

>SfruCSP18

ATGGGAAATTACGTGGAAATTATAGTCTTGGAACCTTAAAGAAGATAAGTTGCTGACAAAGGCACT  
ACACCGTGAAATTATGGGTTTGATGGACGACAGTGAGGTGTGTAATGACACACTAGAACCCCAT  
ACATGTATACTGTGTTTACCATGAGAAGTGCAGTAGTTCTGTGGAACATGATTGTTGAGGTTACT  
TTGACTGTGGATAGTGACGTAAGACAGAAAATGAAGTCCTTCATAGTTTTGTGTTTGTTCGGTCT  
GGCTGCGGTGGCTCTGGCCAAGCCAAATGGCAGCACTTACACCGACAGGTACGACAATGTCAACC  
TGGATGAGATCCTCGGAAACCGTCGTCTCCTGACTCCTTACATTAAGTGCATCCTCGAAGAGGGC  
AAGTGCAGTGTGATGGCAAGGAACCTGAAATCTCACATCAGGGAAGCCTTAGAACAGAACTGTGC  
CAAGTGTACTGATGCTCAGCGCAGTGGAACCCGCAGGGTCTTGGGCCACCTCATCAACAACGAAG  
AGGAGTCCTGGAACCGCTCAAGGCCAAATACGACCCTCAGTCCAAATACACCGTCAAATACGAA  
CTCGAACTCAAGAAATTGAAACAATAA

>SfruCSP19

ATGAAGTTTCGTATTAGTAGTCTTCGTTGCAGCCTTTGCGGTGGTAATGGCTGAAGAATCGTACGG  
AACACAGTATGATAATGTAAATGGAGAAGCTATCGTTTCTGACGATAAACAGTTCCAAAGCATCG  
TCGACTGTTTCATGGGCGCTGATTCTTGTAACGAACCTTGCTGCTGCATTCAAAAAAGTTCTACCT  
GAAGCGATTGTACAAGCTTGTGCTAAATGTACTTCAGCACAGAAGCACCTAGCGAGGGTCTTCAT  
AGAAGCATACTCAAAGAAAATGCCACAAGATTATGAAAAGTTCAAAGATTTATTTGATCCTGAAA  
GAAAATACTTTGCCAAATTCGAAGCGTCTGTTACCGGATTTTAA

>SfruCSP20

ATGGGTAAATTGCTGTTCTAAATTACCTACTATGATCAAATACGCGTTGCTGTTATGTTGTGTGGC  
CGCGGTGTCCGTGGCGCAGTCCCAAAGGCCTCCAGTCTCCGACACAGCCCTTGATGATGCCCTAC  
AAGACAAACGTTTCATTTCAGAGACAGCTAAAGTGCAGCTGGGGGAAGGACCTTGTGATCCCATC  
GGGAAAAGACTTAAACACTAGCACCCCTGGTACTTCGAGGAGCCTGTCCCCAGTGACAGCCACA  
AGAAACCAAGCAAATCCAACGCACTCTATCGTACGTGCAAAGAAATTATCCGCAGCAGTGGGCGA  
AAATAGTGCGCCAATACGCAGGATAG

>SfruCSP21

ATGTGGGCTCAGGCGATTCCATACCTGATCGTAGTACATGTGGCGATGGGAGAACAAAAAGTGCC  
AGGGTTCTCTAGAGAAATGAGCGACGGAGTAGAAAGCAGAGGCTTTAAGATCATTTACGGCGATG  
AAGACATGACCATCATCAACCAAGTGGTCAGTGAAGCCGAAAAAGGCAGTGCTTTTAAAGAAGAGA  
GTACGTTTGAATGAAGCTATTAAACCCTTACCGGCGCAAGATGTCAAGTGCTTGATGTCTGTGCA  
CCGGTACTGTAGCAAGGAGATGGGCATGATGAAAAGTGTATTGATACAAGCTGTAAAAGATGACT  
GCGCGAAATGTTTCAGTGGAGCAGAAGGATCAAGCTGGGAAAAGTAATTGCATCCATGATGGCTCAT  
GATCCAGTCGCGTGGAAGTTTTCTCACCAGGTACGACGGCATCAAAAAAGTCCAAAGGATACT  
AGGATAG

>SfruCSP22

ATGGCTTCCTCATACTATTTCAGTGCTCACTGTGAACGAGACTGTTATTTCTTCTGCTGTTCTTG

AATGATGAAGAACTCGTATAAAACAATGATACTCTTAGTATACCTGACAATTCAGAGCAACGCGA  
CAGAGACTTCCACATACACGACCAAATATGATGGCATCGATCTCGACGAAATACTAGACAACGAC  
CGTCTACTGACTGGGTATGTCAACTGTCTGATGGATCTTGGTCCTTGCACGGCTGATGGAAAGGA  
ATTGAAAAAGAACCTTCCGGATGCTATAGACAATGACTGTAAGAAGTGCACTGAGAGACAGCGTG  
AGGGCGCTGACCGTGTCTGTCATTACCTCATCGACAACAGACCTGAAGACTGGACCAAACCTTGAG  
GAGAAATACAAATCTGATGGAAGCTATAGAGCTAAATATTTAGCCAGTAAGCAGACTAAAGATGA  
GAAGGAATCAAATGCCACAAAATCCAGTGAGGATACAAATAATGTATCTAAAGAATAA

---

**Supplemental Table S6. qRT-PCR primers of selected *SfruOBPs* and *SfruCSPs***

| <b>Gene</b>         | <b>Forward primer (5'→3')</b> | <b>Reverse primer (5'→3')</b> |
|---------------------|-------------------------------|-------------------------------|
| <b><i>Rpl32</i></b> | TACAATCGTCAAAAAGAGGACGA       | AAACCATTGGGTAGCATGTGA         |
| <b><i>OBP17</i></b> | AATGTTCCCCAAAACCTCC           | GCTTCTGTATGCAGCCTTAT          |
| <b><i>OBP22</i></b> | CTACTGCGTGCTGCTCAAG           | TGTCGCCCCGTCTGGTCTGC          |
| <b><i>OBP24</i></b> | TCACGCACGATGAGAAGAG           | CAGGACCGCCATGAAGTAG           |
| <b><i>OBP32</i></b> | ACCGCTCCGAATGTCTGACTGA        | CGTCCTTCTTGAACTTGCCATCCT      |
| <b><i>CSP3</i></b>  | TTCCGACAAACCTGTAACCAACCT      | GCTTCCCTGATGTGTTCTGTGTGA      |
| <b><i>CSP19</i></b> | AGCCCTTGATGATGCCCTAC          | CGCACTATTTTCGCCCCACT          |
| <b><i>CSP20</i></b> | CCTTTGCGGTGGTAATGGC           | TCGCTAGGTGCTTCTGTGC           |
